# Supplementary material for: Pairing of single mutations yields obligate Cre-type site-specific recombinases
Source: PubMed Central journal article supplement — Nucleic Acids Res. 2021 Dec 24;50(2):1174–86. doi: 10.1093/nar/gkab1240 (PMC8789052; doi:10.1093/nar/gkab1240), 2021-12-24
Supplement: gkab1240_supplemental_file.pdf [file gkab1240_supplemental_file.pdf]

## Supplementary Information

### Pairing of single mutations yields obligate Cre-type site-specific recombinases

Jenna Hoersten<sup>1</sup>, Gloria Ruiz-Gómez<sup>2</sup>, Felix Lansing<sup>1</sup>, Teresa Rojo-Romanos<sup>1</sup>, Lukas Theo Schmitt<sup>1</sup>, Jan Sonntag<sup>1</sup>, M. Teresa Pisabarro<sup>2</sup> and Frank Buchholz<sup>1,\*</sup>

<sup>1</sup> Medical Faculty and University Hospital Carl Gustav Carus, UCC Section Medical Systems Biology, TU Dresden, 01307 Dresden, Germany

<sup>2</sup> Structural Bioinformatics, BIOTEC TU Dresden, Tatzberg 47-51, 01307, Dresden, Germany

\*To whom correspondence should be addressed. Tel: +49 351 463 40277; Email: frank.buchholz@tu-dresden.de

**Supplementary Figure S1:** Plasmid map for assay to visualize recombination activity.

**Supplementary Figure S2:** Blue-white library screen to identify SSR clones with desired properties.

**Supplementary Figure S3:** Library construction, evolution and selection scheme.

**Supplementary Figure S4:** Gating strategy to evaluate recombination efficiencies of SSRs for the HEK293T reporter cell line.

**Supplementary Figure S5:** MD-based structural analysis of Cre/loxP and the investigated mutants.

**Supplementary Figure S6:** Half-site combinations of the loxF8 target site.

**Supplementary Materials & Methods:** MD simulations protocol

**Supplementary Table S1:** Primers

**Supplementary Table S2:** Sanger sequencing results of colony screen.

**Supplementary Table S3:** Complete sequencing results of colony screen.

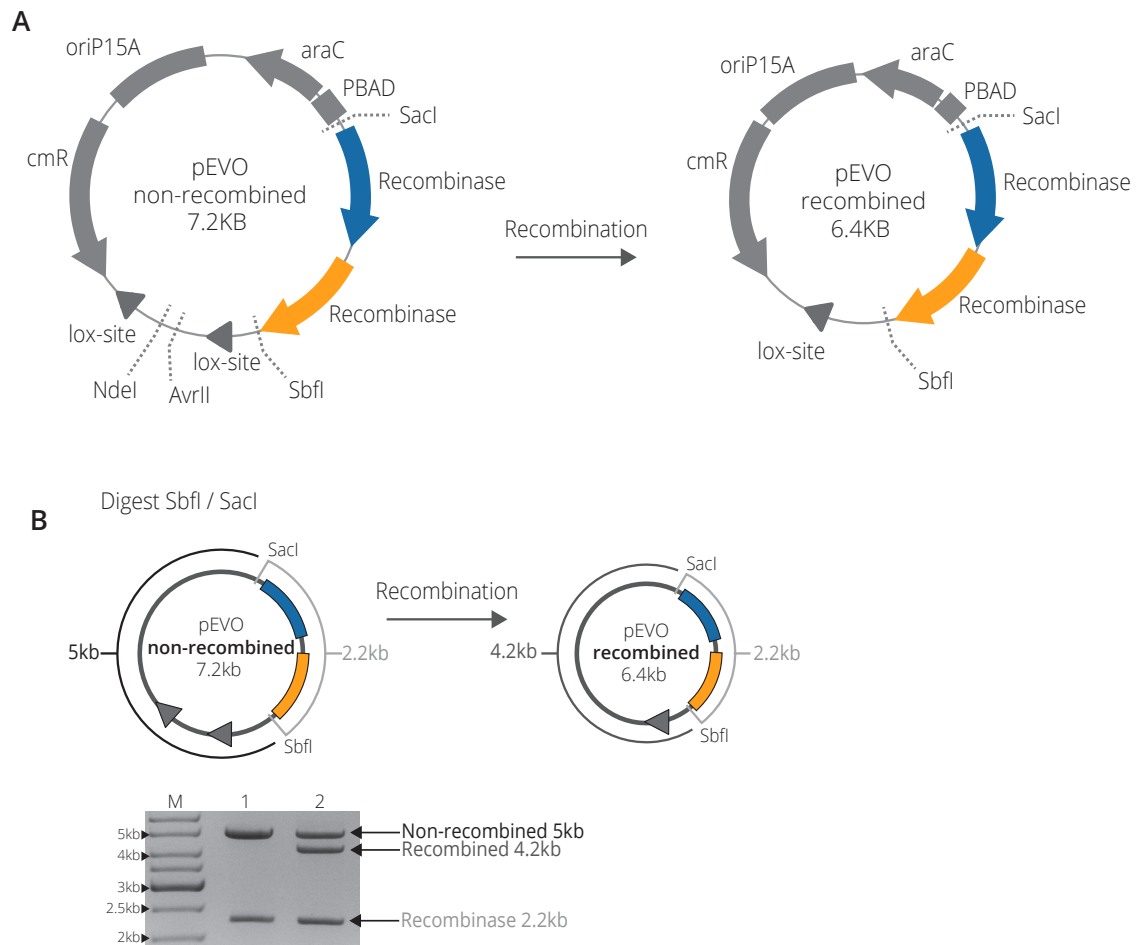

**Supplementary Figure S1: Plasmid map for assay to visualize recombination activity.** A | The vectors are shown before and after SSR-mediated recombination of a 750bp fragment flanked by the lox-sites (gray triangles). Protein coding genes are depicted as arrows, the origin of replication (oriP15A) and the pBAD promoter are shown as rectangles. The protein coding genes include the chloramphenicol resistance gene (cmR), the arabinose regulatory protein (araC) and the genes encoding for the recombinase(s) or libraries of interest. Relevant restriction enzyme sites are shown as dotted lines. B | Bacterial recombination assay. Purified plasmids containing a mixture of recombined and non-recombined target sequences are digested to visualize the amount of recombined vs. non-recombined plasmids in the sample. By digesting the sample with SacI, located upstream of the first recombinase sequence (blue) and SbfI, located downstream of the second recombinase sequence (orange). If non-recombined, the plasmid is cut into fragments of size 2.2kb and 5kb, if recombined the plasmid is cut into fragments of size 2.2kb and 4.2kb. Gel indicates an example digestion where well 1 (1) contains a digested sample of only non-recombined plasmids and well 2 (2) contains a mixture of both recombined and non-recombined plasmids. Sizes are indicated with arrows. M = GeneRuler DNA Ladder Mix 10kb.

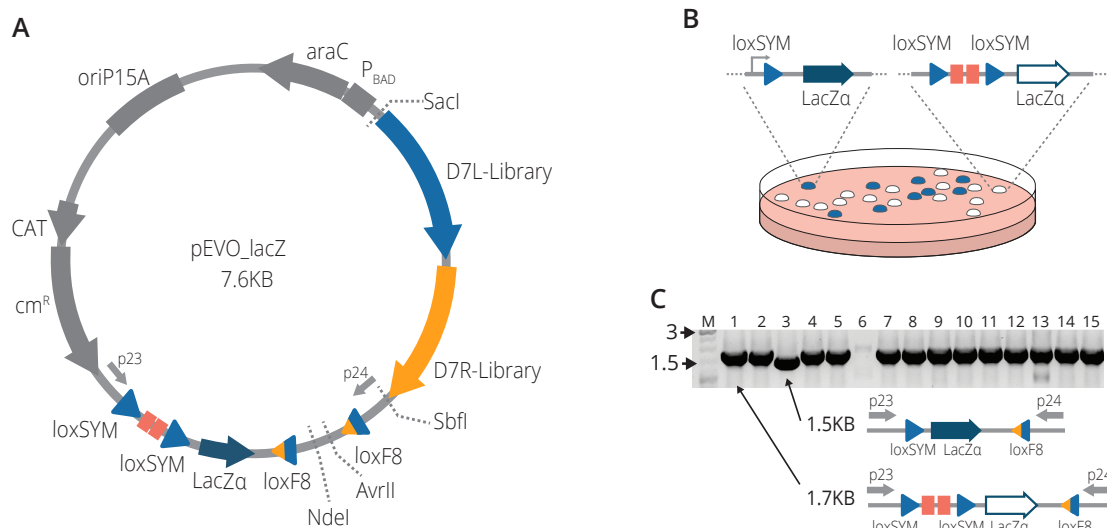

**Supplementary Figure S2 | Blue-white library screen to identify SSR clones with desired properties.**

**A** | Plasmid map of the employed vector. Relevant features of the vectors are shown (see Supplementary Figure 1). The selection plasmid contains transcriptional terminators (red squares) flanked by the symmetric sites (indicated as loxSYM) upstream of LacZ $\alpha$ . Upon recombination of the symmetric sites, the transcriptional terminators are excised allowing for the expression of LacZ $\alpha$  driven by the constitutive cat promoter (CAT). Inactive variants are removed via NdeI and AvrII digest. **B** | Scheme of blue-white screen. The blue colonies contain SSR mutants that did not recombine the symmetric sites. The white colonies are selected, containing mutants that did not recombine the symmetric sites, whereas they had recombined the loxF8 sites. **C** | Example displaying 15 of the 75 amplicon products from the colony PCR. Primers p23 and p24 were used to amplify over the target sites. The resulting amplicon contains a band of 1.5KB if the loxSYM site is recombined and a 1.7KB product if the site is non recombined. M = 10kb ladder (GeneRuler DNA Ladder Mix 10KB).

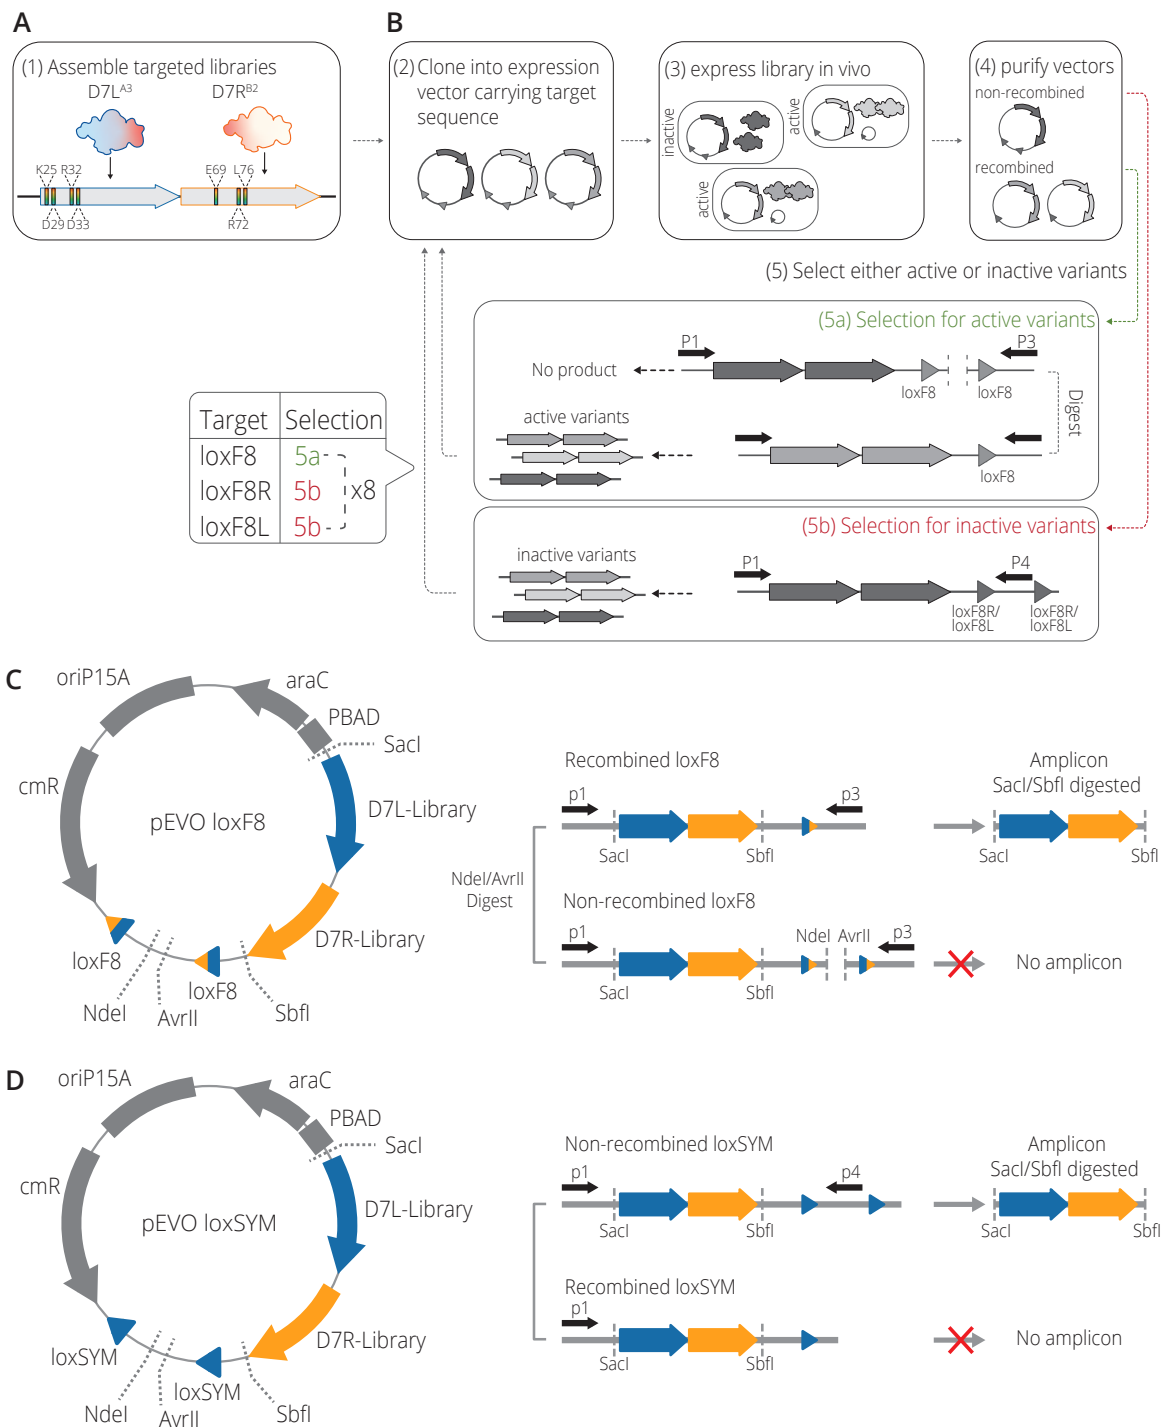

**Supplementary Figure S3 | Library construction, evolution and selection scheme.** A | (1) D7L recombinase (blue) and D7R recombinase (orange) with applied targeted positions indicating the original amino acid and position (rainbow). B | Evolution and selection scheme (2) the constructed libraries are cloned together into the target substrate vector. (3) The constructed vector is transformed into XL1-Blue E. coli and expression of both recombinase libraries is induced. (4) The resulting recombined and non-recombined vectors are purified from the bacteria. (5) Selection of variant pairs that have desired activity, either active on the loxF8 site (5a) or inactive on the loxF8L and loxF8R sites (5b). (5a) Variants active on loxF8 are selected by first digesting the sample with restriction enzymes of sites between the two full loxF8 sites to remove the non-active variants then selecting and evolving the active variants with an error-prone PCR. Primers bind upstream of the recombinase variants (p1) and downstream of the loxF8 site



(p4). The active variants are then carried on through the next cycle. (5b) Selection for variants inactive on the loxF8L or loxF8R sites are isolated via PCR with a primer that binds upstream of the recombinase pair (p1) and between the two full lox sites. C | Plasmid maps for SLiDE strategy to evolve obligate D7 recombinases. Relevant features of the vectors are shown (see Supplementary Figure 1). Selection scheme for substrate-linked directed evolution to screen for recombinase pairs that recombine loxF8. The variants that are not active on the loxF8 target site are removed from the library by digesting the purified plasmid with NdeI/AvrII, linearizing any plasmid that has not undergone recombination. The active variants are then amplified with primers p1 and p3 By PCR to carry the variants to the next cycle of evolution. D | Selection scheme to remove variants capable of recombining the symmetric sites loxF8L or loxF8R (indicated as loxSYM with blue triangles). The variants are amplified with primer p1 and p4 that binds between the symmetric sites, amplifying only those SSRs that did not recombine the target site. SSRs without activity were preferentially amplified by PCR to bring them to the next cycle of evolution.

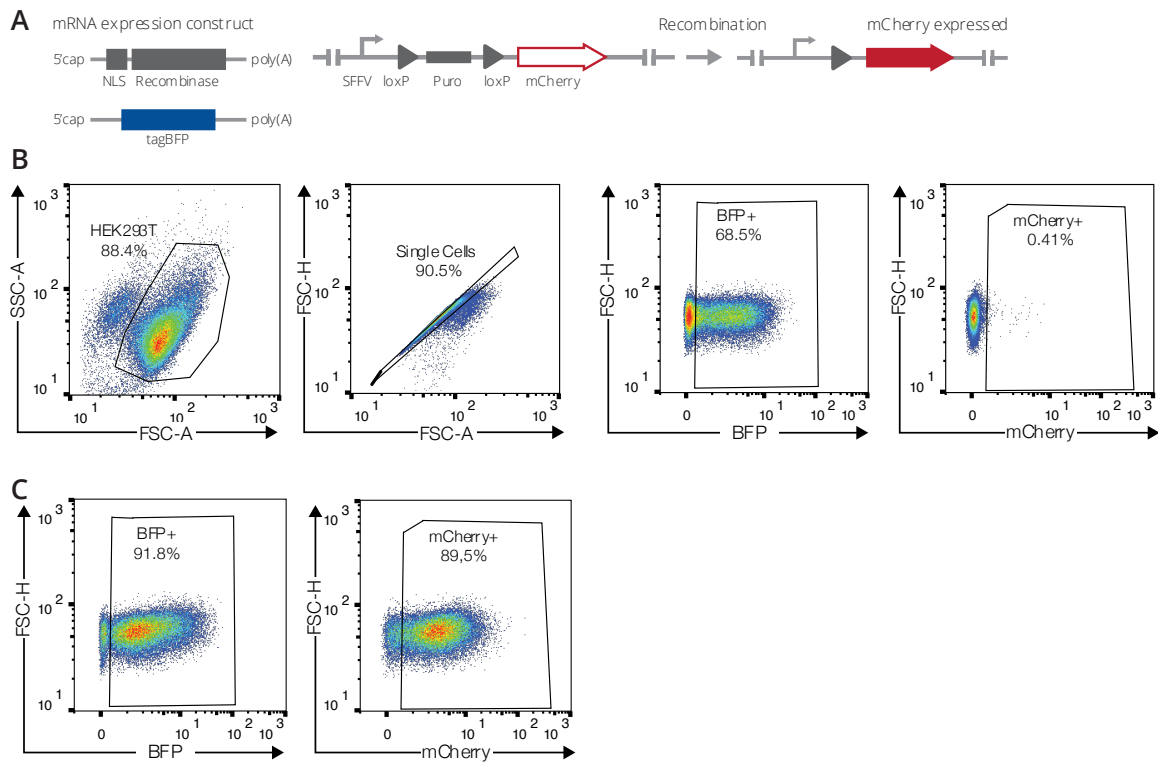

**Supplementary Figure S4 | Gating strategy to evaluate recombination efficiencies of SSRs for the HEK293T reporter cell line.** A | Schematic presentation of mRNA expression constructs and the reporter HEK293T cell line. Employed mRNAs with indicated features (5' cap and polyA tail) expressing a nuclear localization signal (NLS) fused to the recombinase and the tagBFP mRNA are shown. The stable reporter cell line harbours two loxP sites (gray triangles) that flank a puromycin selection gene (puro). Once successfully excised by recombination, mCherry is expressed from the SFFV promoter (arrow). B | Single cells were gated out for live and dead cells. The live cells were gated for BFP+ and mCherry+ cells. C | FACS plots of representative mRNA transfected HEK293T reporter cell line where BFP fluorescence indicates the cells transfected and mCherry fluorescence indicates the gated BFP+ cells with a recombination event.

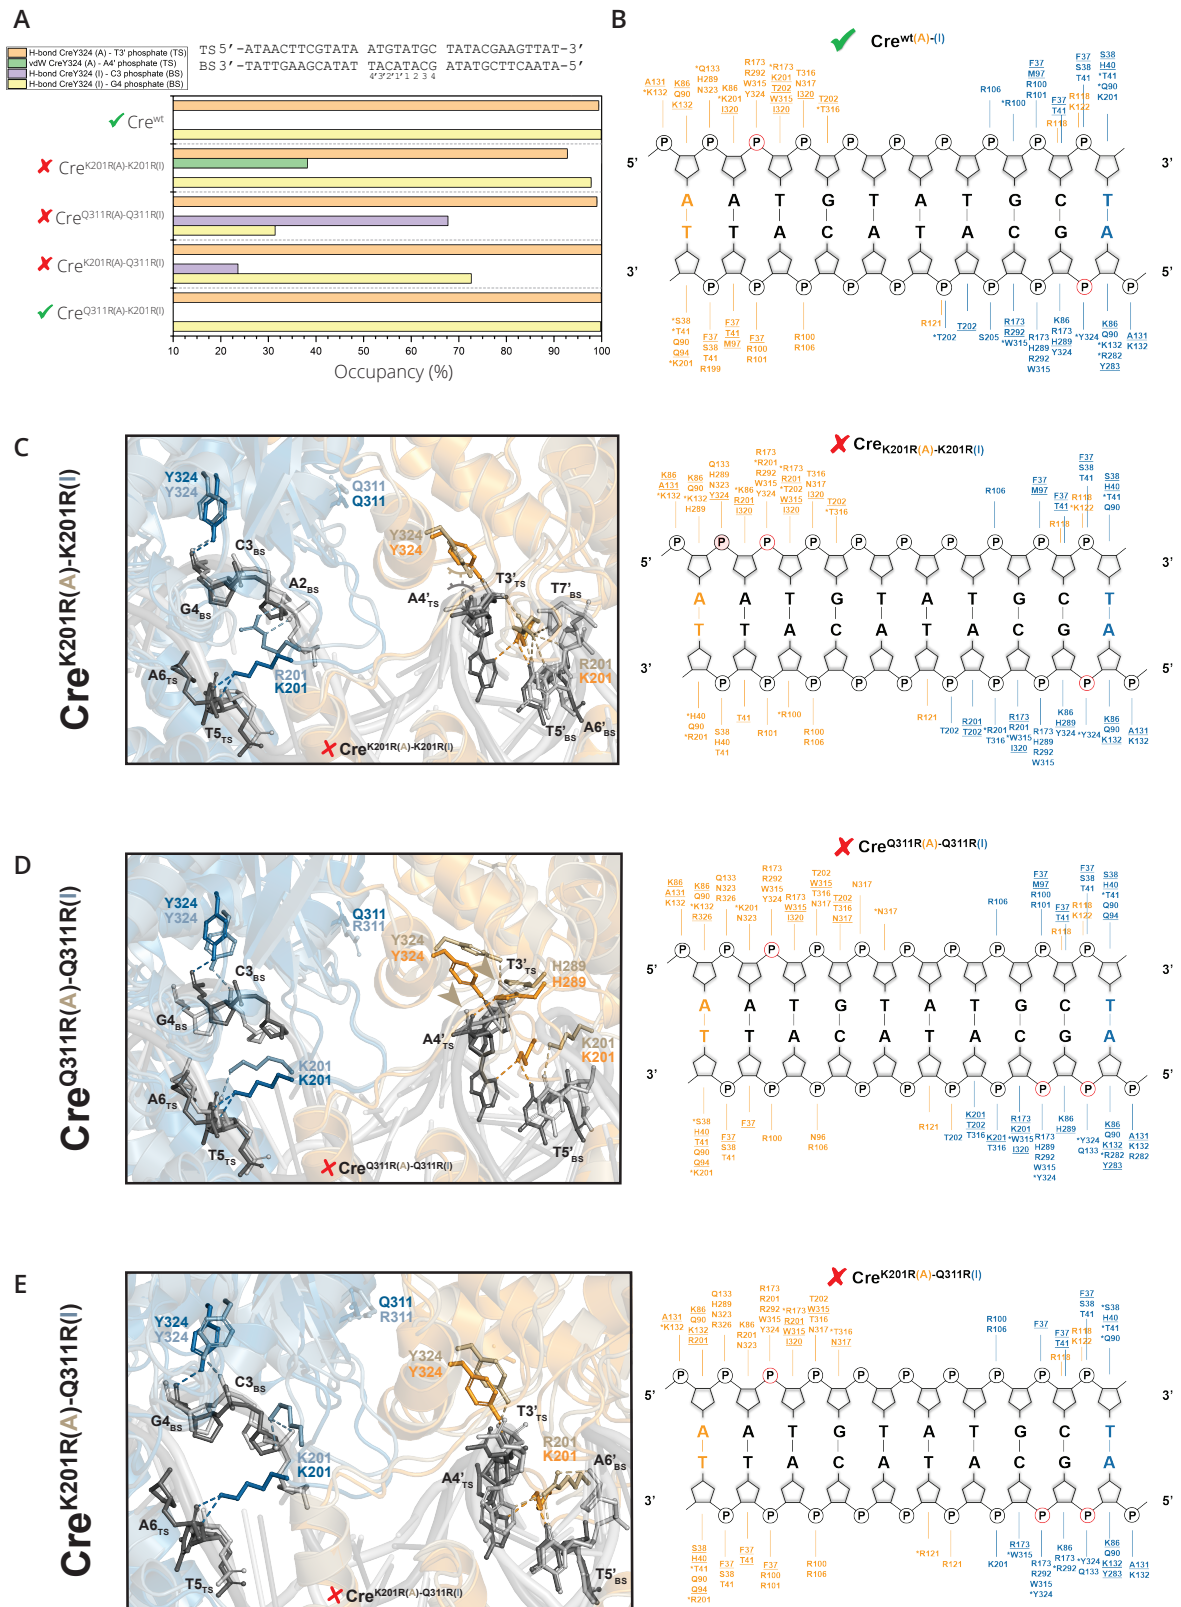

Supplementary Figure S5 | MD-based structural analysis of Cre/loxP and the investigated mutants.

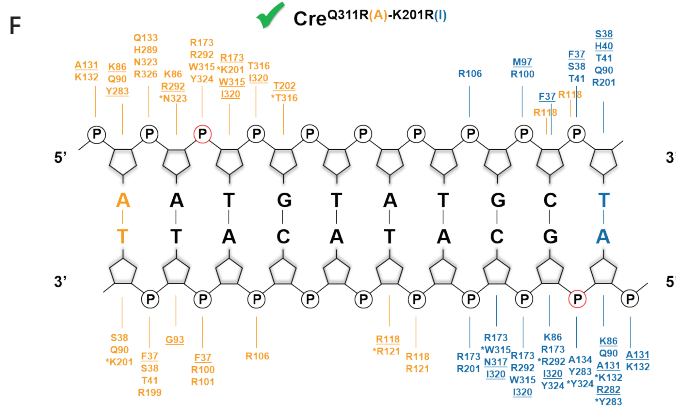

### Supplementary Figure S5 | MD-based structural analysis of Cre/loxP and the investigated mutants.

A | The top of the panel shows the DNA loxP sequence with top (TS) and bottom (BS) strands labelled, and the bases in the spacer region numbered at the bottom. The graph shows a summary of the intermolecular hydrogen bond (H-bond) and van der Waals (vdW) interactions established by the catalytic residue Y324 with the DNA in the last 100 ns of MD simulations for Cre wild type and the studied mutants. Interactions are shown in percentage of occupancy (*i.e.* appearance) with the following color code (summarized in the explanatory caption box at the top left): in orange the appearance (in % occupancy) of H-bond between Y324 and T3'phosphate from TS, in green the appearance of vdW interactions between Y324 and A4'phosphate from TS, in violet the appearance of H-bond between Y325 and C3 phosphate in BS, and in yellow the appearance of H-bond between Y325 and G4 phosphate in BS. The green check mark or red cross at the left of the enzyme names indicate if it is active or inactive, respectively. B | Intermolecular hydrogen bond and van der Waals contacts profile obtained from the analysis of the last 100 ns of MD simulations for Cre<sup>wt</sup>. The DNA is represented schematically with phosphates as circles and bases with the corresponding one-letter code. Enzyme residues establishing contacts with the DNA are listed in orange and blue for the active (A) and inactive (I) monomer, respectively. Bold is used to highlight residues forming H-bond, underlined and bold is used for van der Waals contacts, and residues involved in H-bond and van der Waals contacts simultaneously are highlighted in bold with an asterisk. Phosphate groups involved in Y324 recognition are highlighted with a red circle in the DNA scheme. C | Left panel: details of the superimposition of the MD-refined structures (taken from last 50 ns of simulation) of wild type Cre/loxP and mutant Cre<sup>K201R(A)-K201R(I)</sup>/loxP. In the wild type complex, Cre active (A) monomer is shown in orange, inactive (I) in blue and the DNA in dark gray, whereas for the mutant, the active monomer is shown in ochre, the inactive in gray-blue and the DNA in light gray. For clarity, cartoon representations are shown with transparency and side chains of relevant residues are in balls and sticks and labelled. Intermolecular H-bonds are depicted with dashed lines (ochre and light gray for the active and inactive monomers, respectively). Right panel: intermolecular hydrogen bond and van der Waals contacts profile from last 100 ns of MD simulations of Cre<sup>K201R(A)-K201R(I)</sup>. D | Left panel: details of the superimposition of the MD-refined structures (taken from last 50 ns of simulation) of wild type Cre/loxP and mutant Cre<sup>Q311R(A)-Q311R(I)</sup>/loxP. The lack of H-bond between H289 in the active monomer of Cre<sup>Q311R(A)-Q311R(I)</sup> and the phosphate group of A4'TS in loxP is highlighted with two ochre arrows pointing at those atoms. Right panel: intermolecular hydrogen bond and van der Waals contacts profile from last 100 ns of MD simulations of Cre<sup>Q311R(A)-Q311R(I)</sup>. E | Left panel: details of the superimposition of the MD-refined structures (taken from last 50 ns of simulation) of wild type Cre/loxP and mutant Cre<sup>K201R(A)-Q311R(I)</sup>/loxP. Right panel: intermolecular hydrogen bond and van der Waals contacts profile from last 100 ns of MD simulations of Cre<sup>K201R(A)-Q311R(I)</sup>. F | Intermolecular hydrogen bond and van der Waals contacts profile from last 100 ns of MD simulations of Cre<sup>Q311R(A)-K201R(I)</sup>. In each panel, active versus inactive mutants are highlighted with green tick and red cross symbols at the left of their names, respectively.

**A**

| Name        | Half-site orientation | Full left site                     | Full right site                    |
|-------------|-----------------------|------------------------------------|------------------------------------|
| loxF8       | LR-LR                 | ATAAATCTGTGGAAACGCTGCCACACAATCTTAG | ATAAATCTGTGGAAACGCTGCCACACAATCTTAG |
| loxF8L      | LL-LL                 | ATAAATCTGTGGAAACGCTGCCACACAGATTTAT | ATAAATCTGTGGAAACGCTGCCACACAGATTTAT |
| loxF8R      | RR-RR                 | CTAAGATTGTGTGAACGCTGCCACACAATCTTAG | CTAAGATTGTGTGAACGCTGCCACACAATCTTAG |
| loxF8:RL-RL | RL-RL                 | CTAAGATTGTGTGAACGCTGCCACACAGATTTAT | CTAAGATTGTGTGAACGCTGCCACACAGATTTAT |
| loxF8:LR-RL | LR-RL                 | ATAAATCTGTGGAAACGCTGCCACACAATCTTAG | CTAAGATTGTGTGAACGCTGCCACACAGATTTAT |
| loxF8:LL-LR | LL-LR                 | ATAAATCTGTGGAAACGCTGCCACACAGATTTAT | ATAAATCTGTGGAAACGCTGCCACACAATCTTAG |
| loxF8:RR-LR | RR-LR                 | CTAAGATTGTGTGAACGCTGCCACACAATCTTAG | ATAAATCTGTGGAAACGCTGCCACACAATCTTAG |

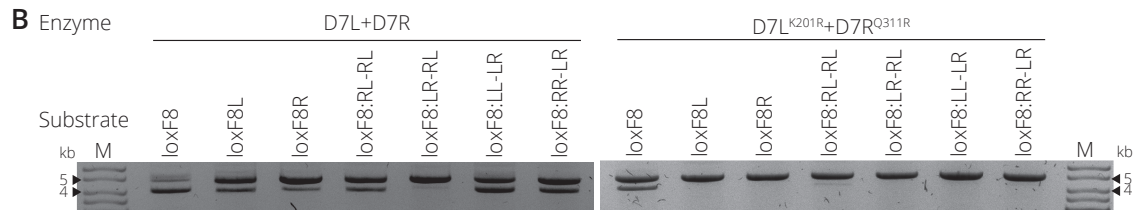

**Supplementary Figure S6 | Half-site combinations of the loxF8 target site.** A | Table showing the different half-site combinations. For example: The loxF8 target (LR-LR) site has: the half-site orientation of the full left loxF8 target sequence, left half-site (L) (blue) then right half-site (R) (orange); the half-site orientation of the full right loxF8 target sequence, left half-site (L) (blue) then right half-site (R) (orange). B | Bacterial assay of recombination activity for D7L+D7R compared to D7L<sup>K201R</sup>+D7R<sup>Q311R</sup> on the half-site combinations. Concentration of L-Arabinose for all samples 10 µg/ml. M = GeneRuler DNA Ladder Mix 10kb.

## Supplementary Materials - MD

### Materials & Methods- MD simulations protocol

The structures of Crewt and mutants in complex with loxP were energy refined by MD simulations in AMBER20 (1) (<https://ambermd.org/>) using the following protocol: Each complex structure was solvated using a truncated octahedral box of SPC water molecules and neutralized with K<sup>+</sup> ions. Simulations were performed with a concentration of 150 mM KCl using Joung and Cheatham parameters (2). Ions were randomly placed in the simulation cell at least 5 Å away from the DNA. MD simulations were preceded by two energy-minimization steps, first with position restraints for the solute (500 kcal/mol·Å<sup>2</sup>) and then without restraints by applying in both cases 5000 cycles of steepest descent and 5000 steps of conjugate gradient. The system was heated up from 200 K to 300 K in 50 ps with weak position restraints (10 kcal/mol·Å<sup>2</sup>). Langevin temperature coupling with a collision frequency  $\gamma = 1 \text{ ps}^{-1}$  was used at this step. Next, three equilibration steps of 500 ps each with consecutively decreased position restraints (10, 5 and 2 kcal/mol·Å<sup>2</sup>, respectively) were conducted under constant pressure of 1 atm using periodic boundary conditions (NPT conditions) at 300 K. The system was further equilibrated during 1 ns without restraints at 300 K under same conditions. A total of 200 ns MD simulation was carried out at 300 K NPT conditions for each complex. The SHAKE algorithm with a time step of 2 fs was used to constrain all bonds involving hydrogen atoms. A cutoff of 10 Å was applied to treat the non-bonded interactions, and the Particle Mesh Ewald (PME) method was used to treat long-range electrostatic interactions.

1. Case,D.A., Belfon,K., Ben-Shalom,I.Y., Brozell,S.R., Cerutti,D.S., Cheatham,T.E., III, Cruzeiro,V.W.D., Darden,T.A., Duke,R.E., *et al.* (2020) Amber 2020 University of California.

2. Joung,I.S. and Cheatham,T.E. (2008) Determination of Alkali and Halide Monovalent Ion Parameters for Use in Explicitly Solvated Biomolecular Simulations. *J Phys Chem B*, **112**, 9020–9041.

**Supplementary Table S1 | Oligonucleotides listed 5' to 3'**

| <b>Primer (p) number</b> | <b>Description</b>                                                           | <b>Oligo Sequence (5'-3')</b>                                                           |
|--------------------------|------------------------------------------------------------------------------|-----------------------------------------------------------------------------------------|
| 1                        | Sequence validation of recombinase in pEVO                                   | TGCATCAGACATTGCCGTCA                                                                    |
| 2                        | Sequence validation of recombinase in pEVO                                   | AGACCGCTTCTGCGTTCTGA                                                                    |
| 3                        | Selection of recombinases active on loxF8 (binds downstream of target sites) | AAGGGAATAAGGGCGACACG                                                                    |
| 4                        | Selection of recombinases inactive on the loxF8L or loxF8R sites             | CTAACTGACACACATCCACA                                                                    |
| 5                        | degenerate VNS codon D7R Position 76 (SNB)                                   | ACGCGTCTGAAGGTGSNBGAGGTAATC                                                             |
| 6                        | degenerate VNS codon D7L Position 32 and 33 (SNB)                            | AGAAAACGCCCGCGSNBSNBGAAGAC                                                              |
| 7                        | Degenerate VNS codon D7L position 25 and 29                                  | AGTGATGAGGCTCGVNSAACCTGATGVNSGTCTTC                                                     |
| 8                        | Degenerate VNS codon D7R position 69 and 72                                  | GTAGAACCTVNSGATGTTVNSGATTACCTC                                                          |
| 9                        | Forward nested PCR primer for D7L                                            | ATGTCCAATCTACAGACCCCTACACCAGAATTTG                                                      |
| 10                       | Degenerate GHW codon D7L position 25 and 29                                  | GAAGACWDCCATCAGGTTWDCGCGAGCCTCATCACT                                                    |
| 11                       | Degenerate MDG codon D7L position 25 and 29                                  | GAAGACCHKATCAGGTTCHKGCGAGCCTCATCACT                                                     |
| 12                       | Degenerate GHW codon D7L position 32, 33 and 35                              | GTCTTCGHWHWCWCGHWCWCGTTTTCTGAAGCT                                                       |
| 13                       | Degenerate MDG codon D7L position 32, 33 and 35                              | GTCTTCMDGMDGCGMDGGCGTTTTCTGAAGCT                                                        |
| 14                       | Reverse nested PCR primer for D7L                                            | ATTCAGCTTGACCATGCCGCCACGTCCGGCA                                                         |
| 15                       | Forward nested PCR primer for D7R                                            | CTGTCCGTTTGCCGGTCGTGGGCGGCATGGTGC                                                       |
| 16                       | Degenerate GHW codon D7R position 69 and 72                                  | GAGGTAATCWDAACATCWDCAGGTTCTACGGG                                                        |
| 17                       | Degenerate MDG codon D7R position 69 and 72                                  | GAGGTAATCCHKAACATCCHKAGGTTCTACGGG                                                       |
| 18                       | Degenerate GHW codon D7R position 76                                         | GATTACCTCGHWACCTTCAGACGCGTGGTCTG                                                        |
| 19                       | Degenerate MDG codon D7R position 76                                         | GATTACCTCMDGCACCTTCAGACGCGTGGTCTG                                                       |
| 20                       | Reverse nested PCR primer for D7R                                            | AGCCCGACGGTGAAGCATGTTTAGCGAGCCCAG                                                       |
| 21                       | mRNA production adding T7 promoter                                           | GCTAATACGACTCACTATAGGGAGAGCCGCCACCATGCCAAAAAGAAG<br>AGAAAGGTAATGTCCAATTTACTGACCGTACACCA |
| 22                       | mRNA production for Cre adding poly(A) signal                                | TTTTTTTTTTTTTTTTGGTTTATTCTTAATCGCCATCTTCCAGCAG                                          |
| 23                       | Colony selection                                                             | GCCCTAACTCCGCCATCC                                                                      |
| 24                       | Colony selection                                                             | ACAGTACTGCGATGAGTGGC                                                                    |

**Supplementary Table S2 | Sanger sequencing results of colony screen.** The table shows variants with mutations at positions D7L - 25, 29, 201, 282, 305 and D7R – 311 (60 out of the 75 sequenced variants). The first row is the original D7 sequence at these positions.

|           | D7L      |          |          |          |          | D7R      |
|-----------|----------|----------|----------|----------|----------|----------|
|           | 25       | 29       | 201      | 282      | 305      | 311      |
| <b>D7</b> | <b>K</b> | <b>D</b> | <b>K</b> | <b>G</b> | <b>S</b> | <b>Q</b> |
| H10       |          |          |          | E        |          | R        |
| H09       | Q        | A        |          |          |          | R        |
| H07       | V        |          |          |          |          |          |
| H05       | Q        | M        | R        |          |          | R        |
| H03       | Q        |          | R        |          |          | R        |
| G12       |          |          |          | E        |          |          |
| G10       | M        | M        | R        |          | P        | R        |
| G09       | A        | V        |          | E        |          |          |
| G07       | V        |          |          | E        |          | R        |
| G06       |          |          | R        | E        |          |          |
| G05       |          |          | R        | E        |          |          |
| G02       |          |          |          |          | P        | R        |
| F10       | E        | V        | R        | E        |          | R        |
| F08       | Q        | K        | R        |          |          | R        |
| F07       | Q        | M        |          | E        |          |          |
| F06       | M        | M        | R        | E        | P        |          |
| F05       |          |          | R        |          |          |          |
| F04       | V        | A        | R        |          |          |          |
| F02       | Q        |          |          |          | P        |          |
| F01       | Q        | V        | R        |          |          | H        |
| E12       |          |          |          | E        |          | R        |
| E11       |          |          | R        | E        |          |          |
| E09       | T        | V        | R        |          |          | R        |
| E07       | M        | M        | R        | E        | P        |          |
| E06       | L        | K        | R        | E        |          | R        |
| E05       | L        | K        | R        | E        | P        |          |
| E03       |          |          | R        | E        | P        |          |
| E02       |          |          | R        |          |          | R        |
| E01       |          |          |          |          | P        |          |
| D11       | R        | M        |          | E        |          |          |
| D10       | E        | A        | R        |          |          | R        |
| D09       |          |          | R        |          |          | R        |
| D07       |          |          | R        |          | P        |          |
| D06       | Q        |          |          | E        |          |          |
| D05       | R        | P        |          | E        | P        |          |
| D04       | Q        | M        |          | E        | P        |          |
| D03       | W        |          |          | E        |          |          |
| D02       | Q        |          |          |          |          | R        |
| D01       |          |          | R        |          |          |          |
| C12       | Q        | L        |          |          |          |          |
| C11       |          |          | R        | E        |          |          |
| C10       |          |          |          | R        |          | R        |
| C09       | E        |          | R        | E        | P        |          |
| C08       | R        | R        | R        |          |          |          |
| C07       |          | K        |          | E        |          | R        |
| C06       | M        |          | R        | E        |          |          |
| C03       |          |          | R        | E        |          | R        |
| C02       |          |          | R        |          | P        |          |
| B12       | V        |          | R        | E        | P        |          |
| B09       |          |          | R        | E        |          | R        |
| B06       |          |          |          | E        | P        | R        |
| B03       |          |          |          | E        | P        | R        |
| B01       | Q        | A        |          |          |          | R        |
| A09       |          | V        |          | E        | P        |          |
| A08       | M        | Q        |          | E        |          | R        |
| A07       | V        | K        | R        |          |          | R        |
| A06       |          |          |          | R        |          | R        |
| A03       |          |          |          | E        |          |          |
| A02       |          |          |          | E        |          | R        |
| A01       | Q        |          | R        | E        |          |          |



**Supplementary Table S3 | Complete sequencing results of colony screen.** The table shows the sequencing results of the recombinase pairs selected from the final library. The recombinase pairs are indicated by the ID where the D7L recombinase variant is shown in blue and the D7R recombinase variant is shown in orange. The table first lists the full sequence of the D7L recombinase variant and then the full sequence of the paired D7R recombinase variant.

| D7L ID | Sequence                                                                                                                                                                                                                                                                                                                                                                         |
|--------|----------------------------------------------------------------------------------------------------------------------------------------------------------------------------------------------------------------------------------------------------------------------------------------------------------------------------------------------------------------------------------|
| A01    | MFNLQTLHQNLAAALLANATSDEARQNLMDFRDRRAFSEATWKTLTLLSVCRTWAAWCKLNNRKWFPAEPEDVRDY<br>LLHLQVRGLAVNTIQRHLALLNMLHRRSGLPRPGDSSAVSLVMRRIKENV DAGERVRQALAFERTDFDKVRS<br>L MGNSDRCQDIRNLAFLGVAYNTLLRISEIARIRIKDISRTDGGRLIHI GRTRTLVSTAGVEKALSLGVTRLVE<br>RWISVSGVAGDPNNYLCRVRKNGVAAPSATSQSLSTDVLRGVFAAAHRLVYGT KDSDSGQEYQTWSGHSARVGAA<br>RDXARAGVSI AEIMQAGGWTTVESMSYXRNLDEXGAMVRLLEDGD*     |
| A02    | MTNLQTLHQNL SALLANATSDEARKNLMDFRDRRAFSEATWKTLTLLSVCRTWAAWCELNNRKWFPAEPEDVRGY<br>LLHLQVRGLAVNTIQRHLALLNMLHRRSGLPRPGDSSAVSLVMRRIKENV DAGERVRQALAFERTDFDKVRS<br>L MGNSDRCQDIRNLAFLGVAYNTLLRISEIARIRIKDISRTDGGRLIHI GRTKTLVSTAGVEKALSLGVTRLVG<br>RWISVSGVAGDPNNYLCRVRKNGVAAPSATSQSLSTDVLRGVFAAAHRLVYGT KDSDSGQEYLTWSGHSARVGAA<br>RDMARAGVSI AEIMQAGGWTTVESVMSYLRSLDSETGAMVRLLEDGD*   |
| A03    | MSNLQTLHQNL SALLANATGDEARKNLMDFRDRRAFSEATWKTLTLLSVCRTWAAWCKLNNRKWFPAEPEDVRDY<br>LLHLQVRGLAVNTIQRHLALLNMLHRRSGLPRPGDSSAVSLVMRRIKENV DAGERVRQALAFERTDFDKVRS<br>L MGNSDRCLDIRNLAFLMGVAYNTLLRISEIARIRIKDISRTDGGRLIHI GRTKTLVSTAGVEKALSLGVTRLVG<br>RWISVSGVAGDPNNYLCRVRKNGVAAPSATSQSLSTDVLRGVFAAAHRLVYGT KDSDSGQEYLTWSGHSARVGAA<br>RDMARAGVSI AEIMQAGGWTTVESMSYLCNLXSETGAMVRLLEDGD*   |
| A04    | MTNLQTLHQNL SALLANATSDEARKNLMDFLRNRRRAFSEATWKTLQSVCRWAAWCKLNNRKWFPAEPEDVRDY<br>LLHLQVRGLAVNTIQRHLALLNMLHRRSGLPRPGDSSAVSLVMRRIKENV DAGERVRQALAFERTDFDRVRS<br>L MGNSDRCQDIRNLAFLGVAYNTLLRISEIARIRIRIDISRTDGGRLIHI GRTRTLVSTAGVEKALSLGVTXLVE<br>RWISVSGVAXDPNNCLFCRVRRYGVAXPSATSQSLSTXALRGXFAAAHRLVYGXKDDSGQXYRTWSGHSARVGAA<br>RDMARAGVXI PEIMQAGGWTTVKXVMHXXRNLDEXGAMVXLL E*       |
| A06    | MTNLQTLHQNL SALLANXTSDEARKNLMDFRDRRAFSEATWKTLTLLSVCRTWAAWCKLNNRKWFPAEPEDVRDY<br>LLHLQVRGLAVNTIQRHLALLNMLHRRSGLPRPGDSSAVSLVMRRI RENV DAGERVRQALPFERTDFDKVRS<br>L MGNSDRCLDIRNLAFLGVAYNTLLRISEIARIRIRIDISRTDGGRLIHI GRTKTLVSTAGVEKALSLGVTRLVX<br>RWISVSGVAGDPNNYLCRVRKNGVAAPSATSQVSTDVLRGVFAAAHRLVYGT KDSDSGQRYLTWSGHSARVGAA<br>RDMARAGVSI AEIMQAGGWTTVESVMSYLRNLDSETGAMVXLL EGD*  |
| A07    | MTNLQTLHQNL SALLANATSDEARVNLMKVFRDRRAFSEATWKTLTLLSVCRTWAAWCKLNNRKWFPAEPEDVRDY<br>LLHLQVRGLAVNTIQRHLALLNMLHRRSGLPRPGDSSAVSLVMRRIKENV DAGERVRQALAFERTDFDKVRS<br>L MGNSDRCQDIRNLAFLGVAYNTLLRISEIARIRIKDISRTDGGRLIHI GRTRTLVSTAGVEKALSLGVTRLVG<br>RWISVSGVAGDPNNYLCRVRKNGVAAPSATSRLSTDVLRGVFAAAHRLVYGT KDSDSGQYLTWSGHSARVGAA<br>RDMARAGVSI AEIMQAGGWTTVESVMSYLRNLDSETGAMVRLLEDGD*    |
| A08    | MFNLQTLHQNL SALLANATSDEARNLMQVFRDRRAFSEATWKTLTLLSVCRTWAAWCKLNNRKWFPAEPEDVRDY<br>LLHLQVRGLAVNTIQRHLALLNMLHRRSGLPRPGDSSAVSLVMRRIKENV DAGERVRQALAFERTDFDKVRS<br>L MGNSDRCQDIRNLAFLGVAYNTLLRTSEIARIRIRIDISRTDGGRLIHI GRTKTLVSTAGVEKALSLGVTRLVG<br>RWISVSGVAGDPNNYLCRVRKNGVTAPSATSQSLSTDVLRGVFAAAHRLVYGT KDSDSGQEYLTWSGHSARVGAA<br>RDMARAGVSI AEIMQAGGWTTVESVMSYLRDL DSETGAMVRLLEDGD* |
| A09    | MTNLQTLHQNL STLLANATSDEARKNLMVLRDRRAFSEATWKTLTLLSVCRTWAAWCKLNNRKWFPAEPEDVRDY<br>LLHLQVRGLAVNTIQRHLALLNMLHRRSGLPRPGDSSAVSLVMRRIKENV DAGERVRQALAFERTDFDKVRS<br>L MGNSDRCQDIRNLAFLGVAYNTLLRISEIARIRIKDISRTDGGRLIHI GRTKTLVSTAGVEKALSLGVTRLVX<br>RWISVSGVAGDPNNYLCRVRKNGVAAPSATSQSLSTDVLRGVFAAAHRLVYGT KDSDSGQEYLTWSGHSARVGAA<br>RDMARAGVPI XEIMQAGGWTTVESVMSYLRNLDSETGAMVXCWRXRL*   |
| A10    | MYNLQTLHQNL SALLANATSDEARKNLMDFRDRRAFSEATWKTLTLLSVCRTWASWCKLSNRKWFPAEPEDVRDY<br>LLHLQVRGLAMNTIQRHLALLNMLHRRSGLPRPGDSSAVSLVMRRIKENV DAGERVRQALAFERTDFDKVRS<br>L MENS DRCQDIRNLAFLGVAYNTLLRXSEIARIRIKDISRTDGGRLIHI GRTRTLVSTAGVEKALSLGVTRLVE<br>RWISVSGVAXDPNNYLCRVRRYGVAXPSATSQSLSTXVLXGXFAAAHRLVYGXKDDSGQEYLAWSGHSARVGAA<br>RDMARAGVXI PEIMQAGGWTTVNSVMNY IRNLE CETGAMVRLLE*     |
| A11    | MXXLQTLHQNL SALLANATSDEARXNLMXVFRDRRAFSEATWKTLTLLSVCRTWAAWCKLNNRKWFPAEPEDVRDY<br>LLHLQVRGLAVNTIQRHLALLNMLHRRSGLPRPGDSSAVSLVMRRIKENV DAGERVRQALAFERTDFDKVRS<br>L MGNSDRCQDIRNLAFLGVAYNTLLRISEIARIRIKDISRTDGGRLIHI GRTKTLVSTAGVEKALSLGVTRLVG                                                                                                                                       |

**Supplementary Table S3**

|     |                                                                                                                                                                                                                                                                                                                                                             |
|-----|-------------------------------------------------------------------------------------------------------------------------------------------------------------------------------------------------------------------------------------------------------------------------------------------------------------------------------------------------------------|
|     | RWISVSGVAGDPNNYLFCRVKNGVAAPSATSQSLSTDVLRGVFAAAHRXVYGTKDDSGQXYLTWSGHSARVGAARDMARAGVSI XEIMQAGGWTTVXXMSYLRNLDSETGAMVL*                                                                                                                                                                                                                                        |
| A12 | MTNLXTLHQXLSALLANATSDEARKNLMDVXRDRRAFSEATWKTLSSVXRTWAAWCKLNNRKFPAEPEDVRDYLLHLQVRGLXVNTIQRHLALLNMLHRRSGLPRPGDSNAVSLVMRRIRKENVDAGERXRQALAFERTDFDRVRS LMGNSDRQCQDIRNLAFLGVAYNTLLRISEIARIRIKDISRTDGGRLIHIIGRTKTLVSTAGVEKALSLGVTRLVE RWISVSGVADDPNNYLFCRVRRYGVAXPSATSQSLSTXXLXGIFAAHRLVYVGXKDDSGQXYLTWSGXSARVGPARDMARAGVPIPEIMQAGGWTTVNSVMNXXRNLDXETGAMVXLL*     |
| B01 | MYSLQTLHQNLSALLANATSDEARQNLMVFRDRRAFSEATWKTLSSVCRWAAWCKLNNRKFPAEPEDVRDYLLHLQVRGLAVNTIQRHLALLNMLHRRSGLPRPGDSSAVSLVMRRIRKENVDAGERVRQALAFERTDFDKVRS LIGNSDRCLDIRNLAFLGVAYNTLLRISEIARIRIKDISLTDGGRMLIRIGSTKTLVSTAGVEKALSLGVTRLVGRWISVSGVAGDPNNYLFCRVKNGVAAPSATSQSLSTDVLRGVFAAAHRLVYGTTRDDSGQYLTWSGHSARVGAARDMARAGVSI AIEIMQAGGWTTVESVMSYLRNLDSETGAMVRLLEDGD*    |
| B02 | MTNLQTLHQNLPALLANATSDEARKNLMDVSRDRRAFSEATWKTLSSVCRWAAWCKLDNRKFPAEPEDVRDYLLHLQVRGLAVNTIQRHLALLNMLHRRSGLPRPGDSSAVSLVMRRIRKENVDAGERVRQALAFERTDFDKVCS LMGNSDRQCQDIRNLAFLGVAYNTLLRISEIARIRIKDISRTDGGRLIHIIGRTKTLVSTAGVEKALSLGVTRLVGRWISVSGVAGDPNNYLFCRVKNGVAAPSATSQSLSTDVLRGVFAAAHRLVYGTKDDSGQGYPTWSGHSARVGAARDMARAGVSI AIEIMQAGGWTTVESVMSYLRNLDSETGAMVRLLEDGD*  |
| B03 | MTNLQTLHQNLSALLANATSDEARKNLMDVFRDRRAFSEATWKTLSSVCRWAAWCKLNNRKFPAEPEDVRDYLLHLQVRGLAVNTIQRHLALLNMLHRRSGLPRPGDSSAVSLVMRRIRKENVDAGERVRQALAFERTDFDKVRS LMGNSDRCLDIRNLAFLGVAYNTLLRLSEIARIRIKDISRTDGGRLIHIIGRTKTLVSTAGVEKALSLGVTRLVGRWISVSGVAGDPNNYLFCRVKNGVAAPSATSQSLSTDVLRGVFAAAHRLAYGTKDDSGQEYLAWSGHSARVGAARDMARAGVPI AIEIMQAGGWTTVESVMSYLRNLDSETGAMVRLLEDGD*   |
| B04 | MSNLQTLHQNLSALLANATSDEARKNLMDVFRDRRAFSEATWKTLSSVCRWAAWCKXNNRKFPAEPEDVRDYLLHLQVRGLAVNTIQRHLALLNMLHRRSGLPRPGDSCAVSLVMRRIRKENVDAGERVRQALAFERTDFDKVRS LXGNSDRQCQDIRNLAFLGVAYNTLLRISEIARIRIKDISRTDGGRLIHIIGRTKTLVSTAGVEKALSLGVTRLVERWISASGVADPNYYLFCRVRRYGAAXPSATSQSLSTXVLRGIFAAHRLVYVGXKDDSSQXYXTWSGHSARVGAARDMARAGVXIPEIMQAGGWTTVNSVMNXXRNLDXEXGAMVRL*         |
| B05 | MXXLQTLHQNLSALLANXTSDEARQNLMXVFRDRRAFSEATWKTLSSVCRWAXWCKLNNRKFPAEPEDVRDYLLHLQVRGLAVNSIQRHLALLNMLHRXSGLPRPGDSSAVSLVMRRIRKENVDAGERVRQALAFERTDFDKVRS LMGNSDRQCQDIRNLAFLGVAYNTLLRISEIARIRIKDISRTDGGRLIHIIGRTTLVSTAGVEKALSLGVSRLVXRWISVSGVAXDPNNYLFCRVKNGVAAPSATXQLSTDVLRGVFAAAHRLXYGTTRDDSGQXYLTWSGHSARVGAARDMARAGVXI XEIMQAGGWTTVEXMNXXRNLDSEXGAMVRLLEDGD*     |
| B06 | MSNLQTLHQNLSALLANXTSDEARKNLMDVFRDRRAFSEATWKTLSSVCRWAAWCKLNNRKFPAEPEDVRDYLLHLQVRGLTVNTIQRHLALLNMLHRWSGLPRPGDSSAVSLVMRRIRKENVDAGERVRQALAFERTDFDKVRS LMGNSDRQCQDIRNLAFLGVAYNTLLRISEIARIRIKDISRTDGGRLIHIIGRTKTLVSTAGAEKALSLGVTRLVGRWISVSGVAXDPNNYLFCRVKNGVAAPSATSQSLSTDVLRGVFAAAHRLVYGTKDDSGQEYLTWSGHSARVGAARDMARAGVPI AIEIMQAGGWTTVESVMSYLRNLDCEETGAMVRLLEDGD* |
| B07 | MYNLQTLHQNLSALLANAASDEARKNLMDVFRDRRAFSEATWKTLSSVCRWAAWCKLNNRKFPAEPEDVRDYLLHLQVRGLXVNTIQRHLALLNMLHRRSGLPRPGDSSAVSLVMRRIRKENVDAGERVRQALAFERTDFDKVRS LMGNSDRCLDIRNLAFLGVAYNTLLRI XE IARIRIKDISRTGGRLIQIGRTTLVSTAGVEKALSLGVTRLVERWISVSGVAXDPNNYLFCRVRRNGVAAPSAASQSLSTDVLRGXFTAHRVYGTKDDSGQXYLTWSGHSARVGAARDMARAGVXIPEIMQAGGWTTVKSVMXYLRNLDSETGAMVRLLEDGD*       |
| B08 | MTNLQTLHQNLXALLANATSDEARXNLXVFRDRRAFSEATWKTLSSVCRWAAWCKLNNRKFPAEPEDVRDYLLHLQVRGLAVXTIQRHLALLNMLHRRSGLPRPGDSSAVSLVMRRIRKENVDAGERVRQALAFERTDFDKVRS LMGNSDRQCQDIRNLAFLGVAYNTLLRXSEIARIRIKDISRTDGGRLIHIIGRTKTLVSTAGVEKALSLGVTRLVGRWISVSGVAGDPNNYLFCRVKNGVAAPSATSQSLSTDVLRGVFAAAHRLVYGTKDDSGQEYXTWSGHSARVGAARDMARAGVSI AIEIMQAGGWTTVESVMSYLRNLDSETGAMVRLLEDGX*   |
| B09 | MSNLQTLHQNLSALLANATSDEARKNLMDVFRDRRAFSEATWKTLSSVCRWAAWCKLNNRKFPAEPEDVRDYLLHLQARGLAVNTIQRHLALLNMLHRRSGLPRPGDSGAVSLVMRRIRKENVDAGERVRQALAFERTDFDKVRS LMGNSDRQCQDIRNLAFLGVAYNTLLRISEIARIRIKDISRTDGGRLIHIIGRTTLVSTAGVEKALSLGVTRLVGRWISVSGVAGDPNNYLFCRVKNGVAAPSATSQSLSTDVLRGVFAAAHRLVYGTKDDSGQEYLTWSGRSARVGAARDMARAGVSI AIEIMQAGGWTTVESVMSYLRNLDSETGAMVRLLEDGD*   |
| B10 | MSNLQTLYQNL SALLANATSDEARKNPMDFRDRRAFSDATWKTLSSVCRWAAWCKLNNRKFPAEPEDVRDYLLHLQVRGLAVNTIQRHLALLNMLHRRSGLPRPGDSSVSLVMRRIRKENVDAGERVRQALAFERTDFDKVRS LKNSDRQCQDIRNLAFLGVAYNTLLRISEIARIRIKDISRTDGGRLIHIIGSTKTLVSTAGVEKALSLGVTRLVGRWISVSGVAGDPDNYLFCRVKNGVAAPSATSQSLSTDVLRGVFAAAHRLVYGTKDDSGQXCLTWSGHSARVGAARDMARAGVSI AIEIMQAGGWTTVESVMSYLRNLDSETGAMVRLLEXGD*    |

**Supplementary Table S3**

|     |                                                                                                                                                                                                                                                                                                                                                                                |
|-----|--------------------------------------------------------------------------------------------------------------------------------------------------------------------------------------------------------------------------------------------------------------------------------------------------------------------------------------------------------------------------------|
| B11 | MTNLQTLHQNL SALLANATSDEARKNLMDVFRDRRAFSEATWKTLSSVCRTWAAWCKLNNRKWFPAEPEDVRDY<br>LLHLQERGLAVNTIIRHLALLNMLHRRSGLPRPGDSSAVSLVMRRIRKENVDAGERVRQALAFERTDFDKVHSL<br>MGNSDRQCQDIRNLAFLGVAYNTLLRISEIARIRIKDISRTDGGRLIHI GRTRTLVSTAGVEKALSLGVTRLVE<br>RWISVSGVAGDPNNYLFCRVRKNGVAAPSATSQSLSTDVLRGVFAAAHRLVYGT KDXSGQXYLTWSGHSARVGAA<br>RDMARAGV SIAEIMQAGGWTTVESMSYLRNLDSETGAMVRLLEXGD*   |
| B12 | MTNLQTLHQNL SALLANATSDEARVSLMDVFRDRRAFSEATWKTLSSVCRTWAAWCKLNNRKWFPAEPEDVRDY<br>LLHLQVRGLAVNTIQRHLALLNMLHRRSGLPRPGDSSAVSLVMRRIRKENVDAGERVRQALAFERTDFDKVRS<br>LGNSDRQCQDIRNLAFLGVAYNTLLRISEIARIRIKDISRTDGGRLIHI GRTRTLVSTAGVEKALSLGVTRLVG<br>RWISVSGVAGDPNNYLFCRVRKNGVAAPSATSQSLSTDVLRGVFAAAHRLVYGT KDDSGQEYLTWSGHSARVGAA<br>RDMARAGVPIAEIMQAGGWTTVESVMSYLRNLDCEETGAMVRLLEEGD*   |
| C02 | MTNLQTLHQNL SLLANATSDEARKNLMDVFRDRRAFSEATWKTLSSVCRTWAAWCKLNNRKWFPAEPEGVRDY<br>LLHLQVRGLAVNTIQRHLALLNMLHRRSGLPRPGDSSAVSLVMRRIRKENVDAGERVRQALAFERTDFDKVRS<br>MGNSDRQCQDIRNLAFLGVAYNTLLRTSEIARIRIKDISRTDGGRLIHI GRTRTLVSTAGVEKALSLGVTRLVG<br>RWISVSGVAGDPNNYLFCRVRKNGVAAPSATSQSLSTDVLRGVFAAAHRLVYGT KDDSGQGYLTWSGHSARVGAA<br>RDMARAGVPIAEIMQAGGWTTVESVMSYLRNLDSETGAMVRLLEGGD*     |
| C03 | MTNLQTLHQNL SALLANATSDEARKNLMDVFRDRRAFSEATWKTLSSVCRTWAAWCKLNNRKWFPAEPEDVRDY<br>LLHLQVRGLAVNTIQRHLALLNMLHRRSGLPRPGDSSAVSLVMRRIRKENVDAGERVRQALAFERTDFDKVRS<br>MGNSDRQCQDIRNLAFLGVAYNTLLRISEIARIRIKDISRTDGGRLIHI GRTRTLVSTAGVEKALSLGVTRLVG<br>RWISVSGVAGDPNNYLFCRVRKNGVAAPSATSQSLSTDVLRGVFATAHRLVYGT RDDSQGEYLTWSGHSARVGAA<br>RDMARAGV SIAEIMQAGGWTTVESVMSYLRNLDSETGAMVRLLEDGD*   |
| C06 | MYYLQTLHQNL SALLANATSDEARMNLMDVFRDRRAFSEATWKTLSSVCRTWAAWCKLNNREWFPAEPEGVRDY<br>LLHLQVRGLAVNTIQRHLALLNMLHRWSGLPRPGDSSAVSLVMRRIRKENVDAGERVRQALAFERTDFDKVRS<br>MGNSDRQCQDIRNLAFLGVAYNTLLRISEIARIRIKDISRTDGGRLIHI GRTRTLVSTAGVEKALSLGVTRLVE<br>RWISVSGVAXDPNNYLFCRVRKNGVAAPSATSQSLSTDVLRGVFAAAHRLVYGT KDDSGQEYLTWSGNSARVGAA<br>RDMARAGV S IXEIMQAGGWTTVESVMSYLRDL DSEAGAMVRLLEDGD* |
| C07 | MYNLQTLHQNL SALLANATSDEARKNLMDVFRDRRAFSEATWKTLSSVCRTWAAWCELNNRKWFPAEPEDVRDY<br>LLHLQVRGLAVNTIQRHLALLNMLHRRSGLPRPGDSSAVSLVMRRIRKENVDAGERVRQALAFERTDFDKVRS<br>MGNSDRQCQDIRNLAFLGVAYNTLLRISEIARIRIKDISRTDGGRLIHI GRTKTLVSTAGVEKALSLGVTRLVG<br>RWISVSGVAGDPNNYLFCRVRKNGVTAPSATSQSLSTDVLRGVFAASHRLVYGT KDDSGQEYLTWSGNSARVGAA<br>RDMARAGV SIAEIMQAGGWTTVESVMSYLCNLDSETGAMVRLLEDGD*   |
| C08 | MSNLQTLHQNL SALLANATSDEARRGLMRAFRDRRAFSEATWKTLSSVCRTWAAWCKLNNRKWFPAEPEDVRDY<br>LLHLQVRGLAVNTIQRHMALNTLHRWSGLPRPGDSSAVSLVMRRIRKENVDAGERVRQALAFERTDFDKVRS<br>MGNSDRQCQDIRNLAFLGVAYNTLLRISEIARIRIKDISRTDGGRLIHI GRTRTLVSTAGVEKALSLGVTRLVG<br>RWISVSGVAGDPNNYLFCRVRKNGVAAPSATSQSLSTDVLRGVFAAAHRLVYGT KDDSGQGYRTWSGLSARVGAA<br>RDMARAGV SIAEIMQAGGWTTVESVMSYLCNLDSETGAMVRLLEDGD*    |
| C09 | MTNLQTLHQNL SALLANATSDEARENLMVFRDRRAFSEATWKTLSSVCRTWAAWCKLNNRKWFPAEPEDVRDY<br>LLHLQVRGLAVNTIQRHLALLNMLHRRSGLPRPGDSSAVSLVMRRIRKENVDAGERVRQALAFERTDFDKVRS<br>MGNSNRCQDIRNLAFLGVAYNTLLRISEIARIRIKDISRTDGGRLIHI GRTRTLVSTAGVEKALSLGVTRLVG<br>RWISVSGVAGDPNNYLFCRVRKNGVAAPSATSQSLSTDALRGVFAAAHRLVYGT KDDSGQEYLTWSGHSARVGAA<br>RDMARAGVPIAEIMQAGGWTTVESMSYLRNLDNETGAMVRLLEDGD*       |
| C10 | MFNLQTLHQNL SALLANATSDEARKNLMDVFRDRRAFSEATWKTLSSVCRTWAAWCKLNNRKWFPAEPEDVRDY<br>LLHLQVRGLAVNTIQRHLALLNMLHRRSGLPRPGDSSAVSLVMRRIRKENVDAGERVRQALAFERTDFDKVRS<br>MGNSDRQCQDIRNLAFLGVAYNTLLRISEIARIRIKDISRTDGGRLIHI GRTKTLVSTAGVEKALSLGVTRLVG<br>RWISVSGVAGDPNNYLFCRVRKNGVAAPSATSQSLSTDVLRGVFAAAHRLVYGT KDDSGQRYLTWSGHSARVGAA<br>RDMARAGV SIAEIMQAGGWTTVESVMSYLRILDSETGAMVRLLEDGD*   |
| C11 | MTNLQTLHQNL SALLANATSGEARKNLMDVFRDRRAFSEATWKTLSSVCRTWAAWCKLNNRKWFPAEPEDVRDY<br>LLHLQVRGLAVNTVQRHLALLNMLHRRXGLPRPGDSSAVSLVMRRIRKENVDAGERVRQALAFERTDFDKVRS<br>MGNSDRQCQDIRNLAFLGVAYNTLLRIPEIARIRIKDISRTDGGRLIHI GRTRTLVSTAGVEKALSLGVTRLVG<br>RWISVSGVAGDPNNYLFCRVGKNGVAAPSATSQSLSTDVLRGVFAAAHRLVYGT KDDSGQEYLTWSGHSARVGAA<br>RDMARAGV SIAEIMQAGGWTTVESVMSYLRNLDSETGAMVRLLEDGD*   |
| C12 | MYNLQTLHQNL SALLANATSDEARQNLMLVFRDRRAFSEATWKTLSSVCRTWAAWCKLNNRKWFPAEPEDVRDY<br>LLHLQVRGLAVNTIQRHLALLNMLHRRSGLPRPGDSSAVSLVMRRIRKENVDAGERVRRALAFERTDFNKVRS<br>MGNSDRQCQDIRSLAFLGVAYNTLLRISEIARIRIKDISRTDGGRLIHI GRTKTLVSTAGVEKALSLGVTRLVE<br>RWISVSGVAGDPNNYLFCRVRKNGVAAPSATSQSLSTDVLRGVFAAAHRLVYGT KDDSGQGYLTWSGHSARVGAA<br>RDMARAGV SIAEIMQAGGWTTVXSVMSYLRNLDSETGAMVRLLEDGD*   |
| D01 | MSNLQTLHQNL SALLANATSDEARKNLMDVFRDRRAFSEATWKTLSSVCRTWAAWCKLNNRKWFPAEPEDVRDY<br>LLHLQVRGLAVNTIQRHLALLNMLHRRSGLPRPGDSSAVSLVMRRIRKENVDAGERVRQALAFERTDFDKVRS<br>MGNSDRQCQDIRNLAFLGVAYNTLLRISEIARIRIKDISRTDGGRLIHI GRTRTLVSTAGVEKALSLGVTRLVG                                                                                                                                        |

**Supplementary Table S3**

|     |                                                                                                                                                                                                                                                                                                                                                                                                                        |
|-----|------------------------------------------------------------------------------------------------------------------------------------------------------------------------------------------------------------------------------------------------------------------------------------------------------------------------------------------------------------------------------------------------------------------------|
|     | RWISVSGVAGDPNNYLFCRVRKNGVAAPSATSQSLSTDVLRGVFAAAHRLVYVTKDDSGQGYLTWSGLSARVGAA<br>RDMARAGVSI A E I M Q A G G W T T V E S V M S Y L C N L D S E T G A M V R L L E D G D *                                                                                                                                                                                                                                                  |
| D02 | MTNLQTLHQNL SALLANAI SDEARQNLMDFRDRRAFSEATWKTL LSV CRTWA AAWCKLNNRKFPAEPEDVRDY<br>LLHLQVRGLAVNTIQRHLALLNMLHRRSGLPRPGDSSAVSLVMRRIRKENVDAGERVRQALAFERTDFDKVRS L<br>KGNSDRCQDIRNLAFLGVAYNTLLRISEIARIRIKDISRTDGG RMLIHIGRTKTLVSTAGVEKALSLGVTRLVG<br>RWISVSGVAGDPNNYLFCRVRKNGVAAPSSTSQSLSTDVLRGVFAAAHRLVYGTTRDDSGQGYLTWSGHSARVGAA<br>RDMARAGVSI A E I M Q A G G W T T V E S V M S Y L H N L X S E X G A M V L L E D G D *   |
| D03 | MTNLQTLHQNL SALLANATSDEARWNLMDFRDRRAFSEATWKTL LSV CRTWA AAWCKLNNRKFPAEPEDVRDY<br>LLHLQVRGLAVNTIQRHLALLNMLHRRSGLPRPGDSSAVSLVMRRIRKENVDAGERVRQALAFERTDFDRVRS L<br>MGSDRCQDIRNLAFLGVAYNTLLRISEIARIRIKDISRTDGG RMLIHIGRTKTLVSTAGVEKALSLGVTRLVG<br>RWISVSGVAGDPNNYLFCRVRKNGVAAPSATSQSLSTDVLRGVFAAAHRLVYGTEDNSGQEYLTWSGHSARVGAA<br>RDMARAGVSI A E I M Q A G G W T T V E S V M S Y L H N L D S E T G A M V R L L E D G D *    |
| D04 | MSNLQTLHQNL SALLANATSDEACQNLLMDFRDRRAFSEATWKTL LSV CRTWA AAWCKLNNRKFPAEPEDVRDY<br>LLHLQVRGLAVNTIQRHLALLNMLHRRSGLPRPGDSSAVSLVMRRIRKENVDAGERVRQALAFERTDFDKVRS L<br>MGNSDRCQDIRNLAFLGVAYNTLLRISEIARIRIKDISRTDGG RMLIHIGRTKTLVSTAGGEKALSLGVTRLVG<br>RWISVSGVAGDPNNYLFCRVRKNGVAAPSATSQSLSTDVLRGVFAAAHRLVYGTKDDSGQEYLTWSGHSARVGAA<br>RDMARAGVPI A E I M Q A G G W T T A K S M S Y L R N L X I E X G A M V L L E X S D *      |
| D05 | MYNLQTLHQNL SALLANATSDEARRNLMDFRDRRAFSEATWKTL LSV CRTWA AAWCKLNNRKFPAEPEDVRDY<br>LLHLQVRGLAVNTIQRHLALLNMLHRRSGLPRPGDSSAVSLVMRRIRKENVDAGERVRQALAFERTDFDKVRS L<br>MGNSDRCQDIRNLAFLGVAYNTLLRISEIARIRIKDISRTDGG RMLIHIGRTKTLVSTAGGEKALSLGVTRLVG<br>RWISVSGVAGDPNNFLFCRVRKNGVAAPSATSQSLSTDVLRGVFAAAHRLVYGTKDDSGQEYLTWSGHSARVGAA<br>RDMARAGVPI A E I M Q A G G W T T V E S V M S Y L R N L D S E T G A M V R L L E D G D *   |
| D06 | MSNLQTLHQNL SALLANATSDEARQSLMDFRDRRAFSEATWKTL LSV CRTWA AAWCKLNNRKFPAEPEDVRDY<br>LLHLQVRGLAVNTIQRHLALLNMLHRRSGLPRPGDSSAVSLVTRRIRKENVDAGERVWQALAFERTDLKDVRS L<br>MGNSDRCQDIRNLAFLGVAYNTLLRISEIARIRIKDISRTDGG RMLIHIGRTKTLVSTAGVEKALSLGVTRLVG<br>RWISVSGVAGDPNNYLFCRVRKNGVAAPSATSQSLSTDVLRGVFAAAHCLVYGTKDDSGQEYLTWSGHSARVGAA<br>RDMARAGVSI A E I M Q A G G W T T V E S V M S Y L R N L D S E T G A M V R L L E D G D *   |
| D07 | MSNLQTLHQNL SALLANATSDEARKNLMDFRDRRAFSEATWKTL LSV CRTWA AAWCKLNNRKFPAEPEDVRDY<br>LLHLQVRGLAVNTIQRHLALLNMLHRRSGLPRPGDSSAVSLVMRRIRKENI DAGERVRQALAFERTDFDKVRS L<br>MGNSDRCQDIRNLAFLGVAYNTLLRISEIARIRIKDISHTDGG RMLIHIGRTTLVSTAGVEKALSLGVTRLVG<br>RWISVSGVAGDPNNYLFCRVRKNGVAAPSATSQSLSTDVLRGVFAAAHRLVYGTKDDSGQGYLTWSGHSARVGAA<br>RDMARAGVPI A E I M Q A G G W T T V E S M S Y L R N L D S E T G A M V X L L E D G D *     |
| D09 | MTNLQTLHQNL SALLANATSDEARKNLMDFRDRRAFSEATWKTL LSV CRTWA AAWCKLNNRKFPAEPEDVRDY<br>LLHLQVRGLAVNTIQRHLALLNMLHCRSGLPRPGDSSAVSLVMRRIRKENVDAGERVRQALAFERTDFDRVRS L<br>MGNSDRCQDIRNLAFLGVAYNTLLRISEVARIRIKDISRTDGG RMLIHIGRTTLVSTAGVEKALSLGVTRLVG<br>RWISVSGIAGDPNNYLFCRVRKNGVAAPSATSQSLSTDVLRGVFAAAHRLVYGTKDDSGQGYLTWSGHSARVGAA<br>RDMARAGVSI A E I M Q A G G W T T V E S V M S Y L R N L D S E X G A M V R L L E D G D *    |
| D10 | MTNLQTLHQNL SALLANATSDEARENLMDFRDRRAFSEATWKTL LSV CRTWA AAWCKLNNRKFPAEPEDVRGY<br>LLHLQVRGLAVNTIQRHLALLNMLHRRSGLPRPGDSSAVSLVMRRIRKENVDAGVRVRQALAFERTDFDKVRS L<br>MGNSDRCQDIRNLAFLGVAYNTLLRIPEIARIRIKDISRTDGG RMLIHIGRTTLVSTAGVEKALSLGVTRLVG<br>RWISVSGVAGDPNNYLFCRVRKNGVAAPSATSQSLSTDVLRGVFAAAHRLVYGTKDDSGQGYLTWSGHSARVGAA<br>RDMARAGVSI A E I M Q A G G W T T V E S V M S Y L R N L D S E X G A M V R L L E D G E *    |
| D11 | MTNLQTLHQNL SALLANATSDEARRNLMDFRDRRAFSEATWKTL LSV CRTWA AAWCKLNNRKFPAEPEDVRDY<br>LLHLQVRGLAVNTIQRHLALLNMLHRRSGLPRPGDSSAVSLVMRRIRKENVDAGERVRQAPAFERTDFDKVRS L<br>MGNSDRCQDIRNLAFLGVAYNTLLRISEIARIRIKDISRTDGG RMLIHIGRTKTLVSTAGVEKALSLGVTRLVG<br>RWISVSGVAGDPNNYLFCRVRKNGVAAPSATSQSLSTDVLRGVFAAAHRLVYGTKDDSGQEYLTWSGHSARVGAA<br>RDMARAGVSV A E I M Q A G G W T T L E S V M S Y L R N L D S E T G A M V R L L E D G D *   |
| D12 | MXNLQTLHQNL SALLANATSDEXRXNLMDFRDRRAFSEATWKTL LSV CRTWA AAWCKLNNRKFPAEPEDVRDY<br>LLHLQVRGLAVNTIQRHLALLNMLHRRSGLPRPGDSSAVSLVMRRIRKENVDAGERVRXALAFERTDFDKXRS L<br>MGNSDRCXDIRNLAFLGVAYNTLLRISEIARIRIKDISRTDGG RMLIHIGRTKTLVSTAGVEKALSLGVTRLVX<br>RWISVSGVAXDPNNYLFCRVRKNGVAAPSATSQSLSTDVLRGVFAAAHRLVYGTKDDSGQEYLTWSGHSARVGAA<br>RDMARAGVSI A E I M Q A G G W T T V E S V M X X L R N L D S E T G A M V R L L E M A I *   |
| E01 | MYNLQTLHQNL SALLANATSDEARKNLMDFRDRRAFSEATWKTL LSV CRTWA AAWCKLNNRRWFPAEPEDVRDY<br>LLHLQVRGLAVNTIQRHLALLNMLHRRSGLPRPGDSSAVSLVMRRIRKENVDAGERVRQALAFERTDFDKVRS L<br>MGXSDRCQDIRNLAFLGVAYNTLLRTSEIARIRIKDISRTDGG RMLIHIGRTKTLVSTAGVEKALSLGVTRLVG<br>RWISVSGVAGDPNNYLFCRVRKNGVAAPSATSQSLSTDVLRGVFAAAHRLVYGTTRDDSGQGYLTWSGLSARVGAA<br>RDMARAGVPI A E I M Q A G G W T T V E S V M S Y L R N L D S E T G A M V R L L E D G D * |

**Supplementary Table S3**

|     |                                                                                                                                                                                                                                                                                                                                                                             |
|-----|-----------------------------------------------------------------------------------------------------------------------------------------------------------------------------------------------------------------------------------------------------------------------------------------------------------------------------------------------------------------------------|
| E02 | MSNLQTLHQNLPALAYATSDEARKNLMDVFRDRRAFSEATWKTLSSVCRTWAAWCKLNNRKWFPAEPEDVRDY<br>LLHLQVRGLAVNTIQRHLALLNMLHRRSGLPRPGDSSAVSLVMRRIRKENVDAGERVRQALAFERTDFDKVRS<br>MGNSDRQCQDIRNLAFLGVAYNTLLRISEIARIRIKDISRTDGGRLIHI GRTRTLVSTAGVEKALSLGVTRLVG<br>RWISVSGVAGDPNNYLFCRVRKNGVAAPSATSQSLSTDVLRGVFAAAHRLVYGTKDDSGQGYLTWSGHSARVGAA<br>RDMARAGVSI AEIMQAGGWTTVESVMSYLRNLDSETGAMVRLLEDGD*   |
| E03 | MTNLQTLHQNL SALLXNATSDEARKNLMDVFRDRRAFSEATWKTLSSVCRTWAAWCKLNNRKWFPAEPEDVRDY<br>LLHLQVRGLXVNXIQRHLALLNMLHRRSGLPRPGDSSAVSLVMRRIRKENVDXGERVRQALAFERTDFDKVRS<br>MGNSDRXXDIRNLAFLGVAYNTLLRISEIARIRIKDISRTDGGRLIHI GRTRTLV SXAGVEKALSLGVTRLVE<br>RWISVSGVAGDPNNYLFCRVRKNGVAAPSATSQSLSTDVLRGVFAAAHRLVYGTKDDSGQEYLTWSGHSARVGAA<br>RDMARAGVPIAEIMQAGGWTTVESVMSYLRNLDSEGAMVRLLEDGD*   |
| E04 | MXNLQTLHQNL TALLANATSDEARXNLMDVFRDRRAFSEATWKTLSSVCRTWAAWCKLNNRKWFPAEPEDVRDY<br>LLHLQIRGLAVNTIQRHLALLNMLHRRSGLPRPGDSSAVSLVMRRIRKENVDAGERVRQALXFERTDFDKVRS<br>MGNSDRQCQDIRNLAFLGVAYNTLLRISEIARIRIKDISRTDGGRLIHI GRTKTLVSTAGVEKALSLGVTRLVG<br>RWISVSGVAGDPNNYLFCRVRKNGVAAPSATSQSLSTDVLRGVFAAAHRLVYGTKDDSGQEYLTWSGLSARVGAA<br>RDMARAGVPIAEIMQAGGWTTVESVMSYLRNLDSETGAMVRLLED*    |
| E05 | MSNLQTLHQNL SAILANATSDEARLNLMKVFRDRRAYSEATWKTLSSVCRTWAAWCKLNNRKWFPAEPEDVRDY<br>LLHLQVRGLAVNTIQRHLALLNMLHRRSGLPRPGDSSAVSLVMRRIRKENVDAGERVRQALAFERTDFDKVRS<br>MGNSDRQCQDIRNLAFLGVAYNTLLRISEIARIRIKDISRTDGGRLIHI GRTRTLVSTAGVEKALSLGVTRLVX<br>RWISVSGVAXDPNNYLFCRVRKNGVAAPSATSQSLSTDVLRGVFAAAHRLVYGTKDDSGQEYLTWSGHSARVGAA<br>RDMARAGVPI XEIMQAGGWTTVESVMSYXRNLDSEXGAMVRLLEDGD* |
| E06 | MSNLQTLHQNL SALLANAASDEARLNLMKVFRDRQAFSEATWKTLSSVCRTWAAWCKLNNRKWFPAEPEDVRDY<br>LLHLQVRGLAVNTIQRHLALLNMLHRRSGLPRPGDSSAVSLVVRIRKENVDAGERVRQALAFERTDFDKVRS<br>MGNSDRQCQDIRNLAFLGVAYNTLLRISEIARIRIKDISRTDGGRLIHI GRTRTLVSTAGVEKALSIGVTRLVG<br>RWISVSGVAGDPNNYLFCRVRKNGVAAPSATSQSLSTDVLRGVFAAAHRLVYGTKDDSGQEYLTWSGHSARVGAA<br>RDMARAGVSI AEIMQAGGWTTVESVMSYLRNLDXETGAMVRLLEXAI*  |
| E07 | MTNLQTLHQNL SALLANATSDEARMNLMVFRDRRAFSEATWKTLSSVCRTWAAWCKLNNRKWFPAEPEDIRDY<br>LLHLQVRGLAVNTIQRHLALLNMLHRRSGLPRPGDSSAVSLVMRRIRKENVDAGERVRQALAFERTDFDKVRTL<br>MGNSDRQCQDIRNLAFLGVAYNTLLRISEIARIRIKDISRTDGGRLIHI GRTRTLVSTAGVEKALSLGVTSLVG<br>RWISVSGVAGDPNNYLFCRVRKNGVAAPSATSQSLSTDVLRGVFAAAHRLVYGTKDDSGQEYLTWSGHSARVGAA<br>RDMARAGVPIAEIMQAGGWTTVXSVMNLYLRNLDSETGAMVRLLEDGD* |
| E08 | MTNLQTLHQNL SALLANATSDEARKNLMDVFRDRRAFSEATWKTLSSVCRTWAAWCKLNNREWFPAEPEDVRDY<br>LLHLQVRGLAVNTIQRHLALLNMLHRRSGLSRPGDSSAVSLVMRRIRKENVDAGERVRQALAFERTDFDKIRSL<br>MGNSDRQCQDIRNLAFLGVAYNTLLRIPEIARIRIKDISRTDGGRLIHI GRTKTLVSTAGVEKALSLGVTRLVG<br>RWISVSGVAGDPNNYLFCRVRKNGVAAPSATSQSLSTDVLRGVFAAAHRLVYGTKDDSGQGYLTWSGHSARVGAA<br>RDMARAGVSI AEIMQAGGWATVESMSYLRDLSETGAMVRLLEDGD*  |
| E09 | MSNLQTLHQNL SALLANATSGEARTNLMVFRDRRAFSEATWKTLSSVCRTWAAWCKLNNRKWFPAEPEDVRDY<br>LLHLQARGLVVNTIQRHLALLNMLHRRSGLPRPGDSSAVSLVMRRIRKENVDAGERVRQALAFERTDFDKVRS<br>MGNSDRQCQDIRNLAFLGVAYNTLLRISEIARIRIKDISRTDGGRLIHI GRTRTLVSTAGVEKALSIGVTRLVG<br>RWISVSGVAGDPNNYLFCRVRKNGVAAPSATSQSLSTDVLRGVFAAAHRLVYGTKDDSGQGYLTWSGHSARVGAA<br>RDMARAGVSI AEIMQAGGWTTVESMSYLRNLDSETGAMVRLLEDGD*   |
| E11 | MTNLQTLHQNL SALLANATSDEARKNLMDVFRDRRAFSETTWKTLSSVCRTWAAWCKLNNRKWFPAEPEDVRDY<br>LLHLQVRGLAVNTIQRHLALLNMLHRRSGLPRPGDSSAVSLVTRIRKENVDAGERVRQALAFERTDFDKVRS<br>MGNSDRQCQDIRNLAFLGVAYNTLLRISEIARIRIKDISHTDGGRLIHI GRTRTLVSTAGVEKALSLGVTRLVG<br>RWISVSGVAGDPNNYLFCRVRKNGVAAPSATSQSLSTDVLRGVFAAAHRLVYGTKDDSGQEYLTWSGHSARVGAA<br>RDMARAGVSI AEIMQAGGWTTVESVMSYLRNLDSETGAMVRLLEDGD*  |
| E12 | MTNPQTLHQNL SALLANATSDEARKNLMDVFRDRRAFSEATWKTLSSACRTWAAWCKLNNRKWFPAEPEDVRDY<br>LLHLQVRGLAVNTIQRHLALLNMLHRRSGLPRPGDSSAVSLVMRRIRKENVDAGERVRQTLAFERTDFDKVRTL<br>MGNSDRQCQDIRNLAFLGVAYNTLLRISEIARIRIKDISRTDGGRLIHI GRTKTLVSTAGVEKALSLGVTRLVG<br>RWISVSGVADDSNNYLFCRVRKNGVAAPSATSQSLSTDVLRGVFAAAHRLVYGTKDDSGQEYLTWSGHSARVGAA<br>RDMARAGVSI AEIMQAGGWTTVESVSYLRDLSETGAMVRLLEDGD*  |
| F01 | MLNLQTLHQNL AALLANATSDEARQNLVVVFRDRRAYSEATWKTLSSVCRTWAAWCKLNNRKWFPAEPEDVRDY<br>LLHLQVRGLAVNTIQRHLALLNMLHRRSGLPRPGDSSAVSLVMRRIRKENVDAGERVRQALAFERTDFDKVRS<br>MGNSDRQCQDIRNLAFLGVAYNTLLRISEIARIRIKDISRTDGGRLIHI GRTRTLVSTAGVEKALSLGVTRLVG<br>RWISVSGVAGDPNNYLFCRVRKNGVAAPSATSQSLSTDVLRGVFATAHRLVYGTKDDSGQGYLTWSGHSARVGAA<br>RDMARAGVSI AEIMQAGGWTTVESVMSCLRNLXSEXGAMVRLLEDGD* |
| F02 | MTDLQTLHQNL SALLANATSDEARQDLMDVFRDRRAFSEATWKTLSSVCRTWAAWCKLNNRKWFPAEPEDVRDY<br>LLHLQVRGLAVNTIQRHLALLNMLHRRSGLPRPGDSSAVSLVMRRIRKENVDAGERVRQALAFERTDFDKVRS<br>MGNSDRQCQDIRNLAFLGVAYNTLLRISEIARIRIKDISRTDGGRLIHI GRTRTLVSAAGVEKALSLGVTRLVG                                                                                                                                     |



**Supplementary Table S3**

|     |                                                                                                                                                                                                                                                                                                                                                                            |
|-----|----------------------------------------------------------------------------------------------------------------------------------------------------------------------------------------------------------------------------------------------------------------------------------------------------------------------------------------------------------------------------|
|     | RWISVSGVAGDPNNYLFCRVRKNGVAAPSATSQSLSTDVLRGVFAAAHRLVYGTKDDSGQGYLTWSGHSARVGAA<br>RDMARAGVPIAEIMQAGGWTTVEGVMSYLRNLDSETGAMVRLLEDGD*                                                                                                                                                                                                                                            |
| F03 | MTNLQTLHQNL SALLANATSDEARMNLMXVFRDRRAFSEATWKTLSSVCRTWAAWCKLNNRKWFPAEPEDVRXY<br>LLHLQVRGLAVNTIQRHLALLNMLHRRSGLPRPGDSXAVSLVMRRIRKENVDAGERVRQALAFERSDFDKVRS<br>MGNSDRCQDIRNLAFLGVAYNTLLRISEIARIRIKDISRTDGGRLIHIIGRTKTLVSTAGVEKALSLGVTRLVG<br>RWISVSGVAGDPNNYLFCRVRKNGVATPSATSQSLSTDVLRGVFAAAHRLVYGTKDDSGQGYLTWSGHSARVGAA<br>RDMARAGVSI AEIMQAGGWTTVESVMSYLRNLDSETGAMVRLLEDGD* |
| F04 | MTNLQTLHQNL SALLANAASDEARVNLMVFRDRRAFSEATWKTLSSVCRTWAAWCKLNNRKWFPAEPEDVRDY<br>LLHLQVRGLAVNTIQRHLALLNMLHRRSGLPRPGDSSAVSLVMRRIRKENVDAGERVRQALAFERTDLDKVRS<br>MGNSDRCQDIRNLAFLGVAYNTLLRMP E IARIRIKDISRTDGGRLIHIIGRTTLVSTAGVEKALSLGVTRLVG<br>RWISVSGVAGDPNNYLFCRVRKNGVAAPSATSQSLSTDVLRGVFAAAHRLVYGTKDDSGQGYLTWSGHSARVGAA<br>RDMARAGVSI AEIMQAGGWTTVESVMSYLRNLXSEXGAMVRLLEDGD* |
| F05 | MTNLQTLHQNL SALLANAASDEARKNLMVFRDRRAFSEATWKTLSSVCRTWAAWCKLNNRKWFPAEPEDVRDY<br>LLHLQVRGLAVNTIQRHLALLNMLHRRSGLPRPGDSSAVSLVMRRIRKENVDAGERVRQALAFERTDFDKVRS<br>MGNSDRCQDIRNLAFLGVAYNTLLRTP E IARIRIKDISRTDGGRLIHIIGRTTLVSTAGVEKALSLGVTRLVT<br>RWISVSGVAGDPNNYLFCRVRKNGVAAPSATSQSLSTDVLRGVFAAAHRLVYGTKDDSGQGYLTWSGHSARVGAA<br>RDMARAGVSI AEIMQAGGWTTVESVMSYLRNLDSETGAMVRLLEDGD* |
| F06 | MTNLQTLHQNL SALLANATSDEARMNLMMAFRDRRAFSEATWKTLSSVCRTWAAWCKLNNRKWFPAEPEDVRDY<br>LLHLQVRGLAVNTIQRHLALLNMLHRRSGLPRPGDSSAVSLVMRRIRKENVDAGERVRQALAFERTDFDKVRS<br>MGNSDRCQDIRNLAFLGVAYNTLLRISEIARIRIKDISRTDGGRLIHIIGRTTLVSTAGVEKALSLGVTRLVG<br>RWISVSGVAGDPNNYLFCRVRKNGVAAPSATSQSLSTDVLRGVFAAAHRLVYGTKDDSGQGYLTWSGHSARVGAA<br>RDMARAGVPI AEIMQAGGWTTVESVMSYLRNLDSETGAMVRLLEDGD*  |
| F07 | MTNLQTLHQNL SALLANATSDEARQNLMMVFRDRRAFSEATWKTLSSVCRTWAAWCKLNNRKWFPAEPEDVRDH<br>LLHLQVRGLAVNTIQRHLALLNMLHRRSGLPRPGDSSAVSLVMRRIRKENVDAGERVRQALAFERTDFDKVRS<br>MGNSDRCQDIRNLAFLGVAYNTLLRVSEIARIRIKDISRTDGGRLIHIIGRTKTLVSTAGVEKALSLGVTRLVG<br>RWISVSGVAGDPNNYLFCRVRKNGVAAPSATSQSLSTDVLRGVFAAAHRLVYGTNDSSGQGYXTWSGHSARVGAA<br>RDMARAGVSI AEIMQAGGWTTVESVMSYLSNLDSETGAMVRLLEDGD* |
| F08 | MSNLQTLHQNL SALLANATSDEARQNLMKVFRDRRAFSEATWKTLSSVCRTWVAWCKLSNRKWFPAEPEDVRDY<br>LLHLQVRGLAVNTIQRHLALLNMLHRRSGLPRPGDSSAVSLVMRRIRKENVDAGERVRQALAFERTDFDKVRS<br>MGNSDRCQDIRNLAFLGVAYNTLLRISEIARIRIKDISRTDGGRLIHIIGRTTLVSTAGVEKALSLGVTGLVG<br>RWISVSGVAGDPNNYLFCRVRKNGVAAPSATSQSLSTDVLRGVFAAAHRLVYGTKDDSGQGYLTWSGHSARVGAA<br>RDMARAGVSI AEIMQAGGWTTVESMSYLRNLDSETGAMVRLLEDGD*   |
| F09 | MXNLQTLHQNLXALLGNATSDEARENLMXVFRDRRAFSEATWKTLSSVCRTWAAWCKLNNRKWFPAEPEDVRDY<br>LLHLQVRGLAVNTIQRHLALLNMLHRRSGLPRPGDSSAVSLVMRRIRKENVDAGERVRQALAFERTDFDKVRS<br>MGNSDRCQDIRNLAFLGVAYNTLLRISEIARIRIKDISRTDGGRLIHIIGRTTLVSTAGVEKALSLGVTRLVG<br>RWISVSGVAGDPNNYLFCRVRKNGVAAPSATSQSLSTDVLRGVFAAAHRLVHGTGKDSGQGYLTWSGHSARVGPA<br>RDMARAGVSI AEIMQAGGWTTVESAMNHLRNLD S*               |
| F10 | MSNLQTLHQNL SXLLANATSDEARENLMVFRDRRAFSEATWKTLSSVCRTWAAWCELNNRKWFPAEPEDVRDY<br>LLHLQVRGLAVNTIQRHLALLNMLHRRSGLPRPGDSSAVSLVMRRIRKENVDAGERVRQALAFERTDFDKVRS<br>MGNSDRXQDIRNLAFLGVAYNTLLRISEIARIRIKDISRTDGGRLIHIIGRTTLVSTAGVEKALSLGVTRLVG<br>RWISVSGVAGDPNNYLFCRVRKNGVAAPSATSQSLSTDVLRGVFAAAHRLVYGTKDDSGQEXXTWSGHSARVGAA<br>RDMARAGVSI AEIMQAGGWTTVESVMSYLRNLDSEAGAMVRLLEDGD*   |
| G02 | MFNLQTLHQNL SALLADATSDEARKNLMVFRDRRAFSEATWKTLSSVCRTWAAWCKLNNRKWFPAEPEDVRDY<br>LLHLQVRGLAVNTIQRHLALLNMLHRRSGLPRPGDSSAVSLVMRRIRKENVDAGECVRQALAFERTDFDKVRS<br>MGNSDRCQDIRNLAFLGVAYNTLLRISEIARIRIKDISRTDGGRLIHIIGRTKTLVSTAGVEKALSLGVTGLVG<br>RWISVSGVAGDPNNYLFCRVRKNGVAVPSATSQSLSTDVLRGVFAAAHRLVYGTKDDSGQGYLTWSGHSARVGAA<br>RDMARAGVPI AEIMQAGGWTTVESVMSYLRNLDSETGAMVRLLEDGD*  |
| G04 | MXNLQTLHQXL SALLANATSDEARXNLMXVXRDRRAFSEATWKTLSSVCRTWAAWCKLNXRKWFPAEPEDVRDY<br>LLHLQVRGLAVNTXQRHLALLNMLHRRSGLPRPGDSSAVSLVMRRIRKENVDAGERVRQALAFERXDFDKVRL<br>MGNSDRCQDIRNLAFLGVAYNTLLRISEIARIRIKDISRTDGGRLIHIIGRTKTLVSTAGVEKALSLGVTRLVE<br>RWISVSGVAGDPNNYLFCRVRRYVAVPSATSQSLSTDVLRGXFAAAHRLVYGTKDDSGQXYLTWSGHSARVGAA<br>RDMARAGVPI XEIMQAGGWTTVESVMSYXRNLDSETGAMVRLLEEGD*  |
| G05 | MTNLQTLHQNL SALLANATSDEARKNLMVFRDRRAFSEATWKTLSSVCRTWAAWCKLNNRKWFPAEPEDVRDY<br>LLHLQVRGLTVNTIQRHLALLNMLHRRSGLPRPGDSSAVSLVMRRIRKENVDAGERVRQALAFERSDFDQVRS<br>VENS DRCQDIRNLAFLGVAYNTLLRISEIARIRIKDISRTDGGRLIHIIGRTTLVSTAGVEKALSLGVTRLVG<br>RWISVSGVAGDPNNYLFCRVRKNGVAAPSATSQSLSTDVLRGVFAAAHRLVYGTKDDSGQEQYQTWSGHSARVGAA<br>RDMARAGVSI AEIMQAGGWTTVESVMXYLCNLDSETGAMVRLLEDGD* |

**Supplementary Table S3**

|     |                                                                                                                                                                                                                                                                                                                                                                                 |
|-----|---------------------------------------------------------------------------------------------------------------------------------------------------------------------------------------------------------------------------------------------------------------------------------------------------------------------------------------------------------------------------------|
| G06 | MTNLQTLHQNL SALLANATSDEARKNLMDVIRDRRAFSEATWKTLSSVCRTWAAWCKLNNRKWFPAEPEDVRDY<br>LLHLQVRGLAVNTIQRHLALLNMLHRRSGLPRPGDSSAVSLVMRRIRKENVDAGERVRQALAFERTDFDKVRS<br>MGNSDRQCQDIRNLAFLGVAYNTLLRMSEIARIRIKDISRTDGGRLIHI GRTRTLVSTAGVEKALSLGVTRLVX<br>RWISVSGVAXDPNNYLFCRVRRYGVAAPSATSQSLSTDVLRGVFAAAHRLVYGTKDDSGQECLTWSGHSARVGAA<br>RDMARAGVSI XEIMQAGGWTTVKSMSYXRNL DSEXGAMVRLLEDG*      |
| G07 | MTNLQTLHQNL SALLANATS DVARVNLMDFRDRRAFSEATWKTLSSVCRTWAVWCKLNNRKWFPAEPEDVRDY<br>LLHLQVRGLAVNTIQRHLALLNMLHRRSGLPRPGDSSAVSLVMRRIRKENVDAGERVRQALAFERTDFDKVRS<br>MGNSDRQCQDIRNLAFLGVAYNTLLRI SEIARIRIKDISRTDGGRLIHI GRTKTLVCTAGVEKALSLGVTRLVG<br>RWISVSGVAGDPNNYLFCRVRKNGVAAPSAISQSLSTDVLRGVFAAAHRLVYSTKDDSGQEYRTWSGHSARVGAA<br>RDMARAGVSI A EIMQAGGWTTVESVMSYLRNL DSETGAMVRLLEDGD*  |
| G09 | MTNPQTLHQNL PALLANATS DEARANLMVFRDRRAFSEATWKTLSSVCRTWAAWCKLNNRKWFPAEPEDVRDY<br>LLHLQVRGLTVNTIQRHLALLNMLHRRSGLPRPGDSSAVSLVMRRIRKENVDAGERVRQALAFERTDFDKVRS<br>MGNSDRQCQDIRNLAFLGVAYNTLLRI SEIARIRIKDISRTDGGRLIHI GRTKTLVSTAGVEKALSLGVTRLVG<br>RWISVSGVAGDPNNYLFCRVRKNGVAAPSATSQSLSTDVLRGVFAAAHRLVYGTKDDSGQEYLSWSGHSARVGAA<br>RDMARAGVSI A EIMQAGGWTTVESMSYLRNL DSETGAMXRLLEXGD*   |
| G10 | MYNLQTLHQNL SALLANATS GEARMLMMVFRDRRAFSEATWKTLSSVCRTWAAWCKLNNRKWFPAEPEDVRDY<br>LLHLQVRGLTVNTIQRHLALLNMLHRRSGLPRPGDSSAVSLVMRRIRKENVDAGERVRQALAFERTDFDKVRS<br>MGNSDRQCQDIRNLAFLGVAYNTLLRI SEIARIRIKDISRTDGGRLIHI GRTRTLVSTAGVEKALSLGVTRLVG<br>RWISVSGVAGDPNNYLFCRVRKNDVAAPSATSQSLSTDVLRGVFAAAHRLVYGTKDDSGQGYLTWSGHSARVGAA<br>RDMARAGVPI A EIMQAGGWTTVESMSYLRNL DSETGAMVRLLEDGD*   |
| G11 | MTNLQTLHQNL SALLANAIS DEARKNLMDVFRDRRAFSEATWKTLSSVCRTWAAWCKLNNRKWFPAEPEDVRDY<br>LLHLQVRGLAVNTIQRHLALLNMLHRRSGLPRPGDSSAVSLVMRRIRKENVDAGERVRQALAFERTDFDKVRS<br>MGNSDRQCQDIRNLAFLGVAYNTLLRI PEIARIRIKDISRTDGGRLIHI GRTKTLVSTAGVEKALSLGVTRLVG<br>RWISVSGVAGDPNNYLFCRVRKNGVAAPSATSQSLSTDVLRGVFAAAHRQVYGTKDDSGQGYLTWSGHSARVGAA<br>RDMARAGVSI A EIMQAGGWTTVESVMSYLRNL DSETGAMVRLLEDGD* |
| G12 | MTNLQTLHQNL SALLADATS DEARKNLMDVFRDRRAFSEATWKTLSSVCRTWAAWCKLNNRKWFPAEPEDVRDY<br>LLHLQVRGLAVNTIQRHLALLNMLHRRSGLPRPGDSSAVSLVMRRIRKENVDAGERVRQALAFERTDFDQVRS<br>MGNSDRQCQDIRNLAFLGVAYNTLLRI PEIARIRIKDISRTDGGRLIHI SRKTLVSTAGVEKALSLGVTRLVG<br>RWISVSGVAGDPNNYLFCRVRKNGVAAPSATSQSLSTDVLRGVFAAAHRLVYGTKDDSGQEYLTWSGHSARVGAA<br>RDMARAGVSI A EIMQAGGWTTVESMSYLRNL DSETGAMVRLLEDGD*   |
| H02 | MTNLQTPHQNL PALLANXTS DEARXNLMDVFRDRRAFSEATWKTLXSVCRTWAAWCKLNNRKWFPAEPEDVRDY<br>LLHLQVRGLAVNTIQRHLALLNMLHRRSGLPRPGDSSAVSLVMRRIRKENVDAGERVRQALAFERTDFDKVRS<br>MGNSDRQCQDIRNLAFLGVAYNTLLRI SEIARIRIKDISRTDGGRLIHI GRTRTLVSTAGVEKALSLGVTRLVG<br>RWISVSGVAGDPNNYLFCRVRKNGVAAPSATSQSLSTDVLRGVFAAAHRLVYGTKDDSGQGYQTWSGLSARVGAA<br>RDMARAGVSI A EIMQAGGWTTVESVMSYLRNL DSETGAMVRLLEMAI* |
| H03 | MSNLQTLHQNL SALLANATS DEARQNLMDVLRDRRAFSEATWKTLSSVCRTWAAWCKLNNRKWFPAEPEDVRDY<br>LLHLQVRGLTVNTIQRHLALLNMLHRRSGLPRPGDSSAVSLVMRRIRKENVDAGERVRQALAFERTDFDKVRS<br>MGNSDRQCQDIRNLAFLGVAYNTLLRVSEIARIRIKDISRTDGGRLIHI GRTRTLI STAGVEKALSLGVTRLVG<br>RWISVSGVAGDPNNYLFCRVRKNGVAAPSASSQSLSTDVLRGVFAAAHRLVYGTKDDSGQGYLTWSGHSARVGAA<br>RDMARAGVSI A EIMQAGGWTTIESVMSYLRNL DSETGAMVRLLEDGD* |
| H04 | MFNLQTLHQNL SALLGNATS DEARRNLMKVFRDRRAFSEATWKTLSSVCRTWAAWCKLNNRKWFPAEPEDVRDY<br>LLHLQVRGLAVNTIQRHLALLNMLHRRSGLPRPGDSSAVSLVMRRIRKENVDAGERVRQALAFERTDFDKVRS<br>MGNSDRQCQDIRNLAFLGVAYNTLLRI SEIARIRIKDISRTDGGRLIHI GSTKTLVSTAGVEKALSLGVTRLVG<br>RWISVSGVAGDPNNYLFCRVRKNGVAAPSATSQSLSTDVLRGVFAAAHRLVYGTKDDSGQXYLTWSGHSARVGAA<br>RDMARAGVSI A EIMQAGGWTTVESVMXYLRNL DSETGAMVRLLEDGD* |
| H05 | MSNLQTLHQNL SALLANATS DEARQNLMMVFRDRRAFSEATWKTLSSVCRTWAAWCKLNNRKWFPAKPEDVRDY<br>LLHLQVRGLAMNTIQRHLALLNMLHRRSGLPRPGDSSAVSLVMRRIRKENVDAGERVRQALAFERTDFDKVRS<br>MGNSDRQCQDIRNLAFLGVAYNTLLRI SEIARIRIKDISRTDGGRLIHI GRTRTLVSTAGVEKALSLGVTRLVG<br>RWISVSGVAGDPNNYLFCRVRKNGVAAPSATSQSLSTDVLRGVFAAAHRLVYGTKDDSGQGYLTWSGHSARVGAA<br>RDMARAGVSI A EIMQAGGWTTVESVMSYLRNL DSETGAMVRL*      |
| H06 | MTNLQTLHQNL SALLXANATS DEARQNLMDVXRDRRAFSEATWKTLSSVCRTWAAWCKLNNRKWFPAEPEDVRDY<br>LLHLQVRGLAVNTIQRHLALLNMLHRXSGLPRPGDSSAVSLVMRRIRKENVDAGERXRQALPFERTDFDKVRS<br>MGNSDRXCQDIRNLAFLGVAYNTLLRI SEIARIRIKDISRTDGGRLIHI GRTKTLVSTAGVEKALSLGVTRLVE<br>RWISVSGVADDPNNYLFCRVRRYGVAAPSATSQSLSTDVLRGIFAAHRLVYGXKDDSGQXYLTWSGHSARVGAA<br>RDMARAGVXI PEIMQAGGWTTVKGXNXRNL DSETGAMVRLLEX*      |
| H07 | MTNLQTLHQNL SALLANATS DXARVNLMDVSRDRRAFSEATWKTLSSVCRTWAAWCKPNNRKWFPAEPEDVRDY<br>LLHLQVRGLAVNTIQRHLALLNMLHRRSGLPRPGDSSAVSLVMRRIRKENVDAGERVRQALAFERTDFDKVRS<br>MGNSDRQCQDIRNLAFLGVAYNTLLRI XE IARIRIKDISRTDGGRLIHI SRKTLVSTAGVEKALSLGVTRLVX                                                                                                                                       |

**Supplementary Table S3**

|     |                                                                                                                                                                                                                                                                                                                                                                               |
|-----|-------------------------------------------------------------------------------------------------------------------------------------------------------------------------------------------------------------------------------------------------------------------------------------------------------------------------------------------------------------------------------|
|     | RWISVSGVAGDPNNYLFCRVRKNGVAAPSATSQSLSTDVLRGVFAAAHRQVYGTMDDSGQGYLTWSGHSARVGAA<br>RDMARAGVSI AEIMQAGGWTTVESVMSYLRNLDSETGAMVRLLEDGD*                                                                                                                                                                                                                                              |
| H08 | MXNLQTLHQNL SALLANATSDEARXNLMDFRDRRAFSEATWKTLSSVCRTWAAWCKLNNRKFPAEPEDVRDY<br>LLHLQVRGLAVNTIQRHLALLNMLHRRSGLPRPGDSSAVSLVMRRIRKENVDAGERVRQALAFERTDFDKVRS<br>L MGNSDRCQDIRNLAFLGVAYNTLLRI SEIARIRIKDISRTDGGRLIHI GRTRTLVSTAGVEKALSLGVTRLV<br>G RWISVSGVAGDPNNYLFCRVRKNGVAAPSATSQSLSTDVLRGVFAAAHRLVYGTKDDSGQGYLTWSGHSARVGAA<br>RDMARAGVPI AEIMQAGGWTTVESVMSYLRNLDSEXGAMVRLLEDGD*  |
| H09 | MTNLQTLHQNL SALLANATSDEACQNLMVFRDRRAFSEATWKTLSSVCRTWAAWCKLNNRKFPAEPEDVRDY<br>LLHLQVRGLAVNTIQRHLALLNMLHRRSGLPRPGDSSAVSLVMRRIRKENVDAGERVRQALAFERTDFDKVRS<br>L MGNSDRCQDIRNLAFLGVAYNTLLRI SEIARIRIKDISRTDGGRLIHI GRTKTLVSTAGVEKALSLGVTRLV<br>G RWISVSGVAGDPNNYLFCRVRKNGVAAPSATSQSLSTDVLRGVFAAAHRLVYGTKDDSGQGYLTWSGHSARVGAA<br>RDMARAGVSI AEIMQAGGWTTVESVMSYLRNLDXETGAMVRLLEDGD*  |
| H10 | MTNLQTLHQNL SALLANATSDEARKNLMDFRDRRAFSEATWKTLSSVCRTWAAWCKLNNRKFPAEPEDVRDY<br>LLHLQVRGLAVNTIQRHLALLNMLHRRSGLPRPGDSSAVSLVMRRIRKENVDAGERVRQALAFERTDFDKVRS<br>L MGNSDRCQDIRNLAFLGVAYNTLLRTP E IARIRIKDISRTDGGRLIHI SRKTTLVSAAGVEKALSLGVTRLV<br>G RWISVSGVAGDPNNYLFCRVRKNGVAAPSATSQSLSTDVLRGVFAAAHRLVYGTKDDSGQGYLTWSGHSARVGAA<br>RDMARAGVSI AEIMQAGGWTTVESVMSYLRNLDSETGAMVRLLEDGD* |
| H11 | MTXLXLTHXNLXALLANATSDEARXNLMDFRDRRAFSEATWKTLSSVCRTWAAWCKLNNRKFPAEPEDVRDY<br>LLHLQVRGLAVNTIQRHLALLNMLHRRSGLPRPGDSSAVSLVMRRIRKENVDAGERVRQALAFERTDFDKVRS<br>L XXNSDRCQDIRNLAFLGVAYNTLLRI XAIARIRIKDISRTDGGRLIHI GRTXTLVSTAGVEKALSLGVTRLV<br>G RWISVSGVAGDPNNYLFCRVRKNGVAAPSATSQSLSTDVLRGVFAAAHRLV*                                                                               |

| D7R ID | Sequence                                                                                                                                                                                                                                                                                                                                                                           |
|--------|------------------------------------------------------------------------------------------------------------------------------------------------------------------------------------------------------------------------------------------------------------------------------------------------------------------------------------------------------------------------------------|
| A01    | QFHIRTPHQSL SALLTDATSEVTRKNLADMFRDSQAFSEHTWKMLLSVCRSWAAWCELNNRKLWPVEPEDVRDY<br>LLHLQTRGLAVKTIQHHLGSLNMLHRRAGLPRPGDSSAVSLVMRRIRRENVDAGERAQALAFERTDFDQVRS<br>L VENS DRCQDIRNLAFLGVAYNTLLRI SEIARIRIKDISRTDGGRLIHI GRTKTQVSSAGVEKALSLGVTKLVE<br>R WISVSGVADDPNNYLFCRVRRYGVAKPSATSQSLSTYALQGI FGAHRLVYGA KGDSGQKYLAWSGHSARVGAA<br>RDMARAGVPI PEIMQAGGWTTVNSVMNY IRNLDSETGVMVRLLEDSD*   |
| A02    | MPNLRPPHQSL SALLTDATSDVTRKNLADMFRDSQAFSEHTWKMLLSVCRSWAAWCELNNRKLWPVEPEDVRDY<br>LLHLQTRGLAVKTIQHHLGSLNMLHRRAGLPRPGDSSAVSLVMRRIRRENVDAGERALQALAFERTDFDQVRS<br>L VGNS DRCQDIRNLAFLGVAYNTLLRI SEIARIRIKDISRTDDGRMLIHI GRTKTLVSTAGVEKALSLGVTKLVE<br>R WISVSGVADDPNNYLFCRVRRYGVAKPSATSQSLSTYALQGI FGAHRLVYGA KGDSGQKYLAWSGHSARVGAA<br>RDMARAGVPI PEIMRAGGWTTVNSVMNY IRNLDSETGAMVRLLEDSD* |
| A03    | MPNLQTPHQSL SALLTDATSDVTRKNLADMFRDSQAFSEHTWKMLLSVCRSWAAWCELNNRKLWPVEPEDVRDY<br>LQHLQTRGLAVRTIQHHLGSLNMLHRRAGLPRPGDSSAVSLVMRRIRRENVDAGERAQALAFERTDFDQVRS<br>L VENS DRCQDIRNLAFLGVAYNTLLRI SEIARIRIKDISRTDGGRLIHI GRTKTLVSTAGVEKALSLGVTKLVE<br>R WISVSGVADDPNNYLFCRVRRYGI AKPSATSQSLSTYALQGI FGAHRLVYSA KGVSQKYLAWSGHSARVGAA<br>RDMARAGVPI PEIMQAGGWTTVNSVMNY IRNLDSETGAMVRLLEDSD*   |
| A06    | RSNLQTPPQSLCITDDATSDTCKNLANI FRDSQAFSEHTWKMLLSVCRSWAAWCELNNRKLWPVEPEDVRDYLL<br>HLQTRGLAVKTIQHHLGSLNMLHRRAGLPRPGDSSAVSLVMRRIRRENVDAGERAQALAFGRDQVRS<br>L VENS DRCQDIRNLAFLGVAYNTLLRI SEIARIRIKDISRTDGGRLIHI GRTKTLVSTAGVEKALSLGVTKLVE<br>R WISVSGVADDPNNYLFCRVRRYGVAKPSATSQSLSTYALQGI FGAHRLVYGA KGDSGQKYLAWSGHSARVGAARD<br>M ARAGVPI PEIMRAGGWTTVNSVMNY IRNLDSETGAMVRLLEDSD*       |
| A07    | SSPFPDPPPSL SALLTDAMSDVTRKNLADVFRDSQAFSEHTWKMLLSVCRSWAAWCELNNRKLWPVEPEDVRDY<br>LLHLQTRGLAVKTIQHHLGSLNMLHRRAGLPRPGDSSAVSLVMRRIRRENVDAGERAQALAFERTDFDQVRS<br>L VENS DRCQDIRNLAFLGVAYNTLLRI SEIARIRIKDISRTDGGRLIHI GRTKTLVSTAGVEKALSLGVTKLVE<br>R WISVSGVADDPNNYLFCRVRRYGVAKPSATSQSLSTYALQGI FGAHRLVYGA KGDSGQKYLAWSGHSARVGAA<br>RDMARAGVPI PEIMRAGGWTTVNSVMNY IRNLDSETGAMVRLLEDSD*   |
| A08    | ISNLQTPHQSL SALLTDATSDVTRKNLAVMFRDSQAFSEHTWKMLLSVCRSWAAWCELNNRKLWPVEPEDVRDY<br>LLHLQTRGLAVKTIQHHLGSLNMLHRRAGLPRPGDSSAVSLVMRRIRRENVDAGERAQALAFERTDFDQVRS<br>L VENS DRCQDIRNLAFLGVAYNTLLRI SEIARIRIKDISRTDGGRLIHI GRTKTLVSTAGVVKALSLGVTKLVE<br>R WISVSGVADDPNNYLFCRVRRYGVAKPSATSQSLSTYALQGI FGAHRLVYGA KGDSGQKYLAWSGHSARVGAA<br>RDMARAGVPI PEIMRAGGWTTVNSVMNY IRNLDSETGAMVRLLEDSD*   |
| A09    | RSNLQTPHQSL SALLTDATSDVTRKDLAGMFRDQAFSEHTWKMLLSVCRSWAAWCELNNRKLWPVEPEDVRDY<br>LLHLQTRGLAVRTIQHHLGSLNMLHRRAGLPRPGDSSAVSLVMRRIRRENVDAGERAQALAFERTDFDQVRS<br>L VENS DRCQDIRNLAFLGVAYNTLLRI SEIARIRIKDISRTDGGRLIHI GRTKTLVSTAGVEKALSLGVTKLVE                                                                                                                                           |



**Supplementary Table S3**

|     |                                                                                                                                                                                                                                                                                                                                                                       |
|-----|-----------------------------------------------------------------------------------------------------------------------------------------------------------------------------------------------------------------------------------------------------------------------------------------------------------------------------------------------------------------------|
|     | RWISVSGVADDPNNYLFCRVRRYGVAKPSATSQSLSTYALQRIFGAAHRLVYGAKGDSGQKYLAWSGHSARVGAA<br>RDMARAGVPIPEIMQAGGWTTVNSVMNYIRNLDSETGAMVRLLEDSD*                                                                                                                                                                                                                                       |
| B01 | FSSIYSPHPKLSALLTDATSDVTRKNLADMFRDSQAFSEHTWKMLLSVCRSWAAWCELNNRKWLPVEPEDVRDY<br>LLHLQTRGLAVKTIQHHLGSLNMLHRRAGLPRPGDSNAVSLVMRRIRRENV DAGEHAQQALAFERTDFDQVRS<br>VENS DRCQDIRNLAFLGVAYNTLLRISEIARIRVKDISRTDGGRM LIHIGRTKTLVSTAGVEKALSLGVT<br>RWISVSGVADDPNNYLFCRVRRYGVAKPSATSQSLSTYALQGI FGAAHRLVYGAKGDSGQKYLAWSGHSAR<br>RDMARAGVPIPEIMRAGGWTTVNSVMNYIRNLDSETGAMVRLLEDSD*  |
| B02 | RSNLQTPHQSL SALLTDATSDVTRKNLADMFRDSQAFSEHTWKMLLSVCRSWAAWCELNNRKWLPVEPEDVRDY<br>LLHLQTRGLAVKTIQHHLGSLNMLHRRAGLPRPGDSNAVSLVMRRIRRENV DAGERAQALAFERTDFDRVRS<br>VENS DRCQDIRNLAFLGVAYNTLLRISEIARIRVKDISRTDGGRM LIHIGRTKTLVSTAGVERALSLGVT<br>RWISVSGVADDPNNYLFCRVRRYGVAKPSATSQSLSTYALQGI FGAAHRLVYGAKGDSGQKYLAWSGHSAR<br>RDMARAGVPIPEIMQAGGWTTVNSVMNYIRNLDSETGAMVRLLEDSD*  |
| B03 | PVHIQTPHQSL SALLTDATSDVTRKNLADMFRDSQAFSEHTWKMLLSVCRSWAAWCELNNRKWLPVEPEDVRDY<br>LLHLQTRGLAVRTIQHHLGSLNMLHRRAGLPRPGDSNAVSLVMRRIRRENV DAGEHAQQALAFERTDFDQVRS<br>VENS DRCQDIRNLAFLGVAYNTLLRISEIARIRVKDISRTDGGRM LIHIGRTKTLVSTAGVEKALSLGVT<br>RWISASGVAGDPNNYLFCRVRRYGVAKPSATSQSLSTYALQGI FGAAHRLVYGAKGDSGQKYLAWSGHSAR<br>RDMARAGVPIPEIMRAGGWTTVNSVMNYIRNLDSETGAMVRLLEDSD* |
| B05 | MSNIQTPHQSL FALLTDATSDVTRKNLADMFRDSQAFSEHTWKMLLSVCRSWAAWCELNNRKWLPVEPEDVRDY<br>VHLQTRGLAVKTIQHHLGSLNMLHRRAGLPRPGDSNAVSLVMRRIRRENV DAGERAQALAFERTDFDQVRS<br>ENS DRCQDIRNLAFLGVAYNTLLRISEIARIRVKDISRTDGGRM LIHIGRTKTLVSTAGVEKALSLGVT<br>WISVSGVADDPNNYLFCRVRRYGVAKPSAISQSLSTYALQGI FGAAHRLVYGAKGDSGQKYLAWSGHSAR<br>RDMARAGVPIPEIMQAGGWSTVNSVMNYIRNLDSETGAMVRLLEDGG*     |
| B06 | MSNLQTPHQSL SALLTDATSDVTRKNLADMFRDSQAFSEHTWKMLLSVCRSWAAWCELNNRKWLPVEPEDVRDY<br>LLHLQTRGLAVKTIQHHLGSLNMLHRRAGLPRPGDSNAVSLAMRRIRRENV DAGERAQALAFERTDFDQVRS<br>VENS DRCQDIRNLAFLGVAYNTLLRISEIARIRVKDISRTDGGRM LIHIGRTKTLVSTAGVEKALSLGVT<br>RWISVSGVADDPNNYLFCRVRRYGVAKPSATSQSLSTYALQGI FGAAHRLVYGAKGDSGRKYLAWSGHSAR<br>RDMARAGVPIPEIMRAGGWTTVNSVMNYIRNLDSETGAMVRLLEDSD*  |
| B07 | QVHIQTPHQSL SALLTGATSDVTRKNLADMFRDRQAFSEHTWKMLLSVCRSWAAWCELNNRKWLPVEPEDVRDY<br>LLHLQTRGLAVKTIQHHLGSLNMLHRRAGLPRPGDSSAVSLVMRRIRRENV DAGERAQALAFERTDFDQVRS<br>VENS DRCQDIRNLAFLGVAYNTLLRISEIARIRVKDISRADGGRM LIHIGRTKTLVSTAGVERALSLGVT<br>RWISVSGVADDPNNYLFCRVRRYGVAKPSATSQSLSTYALQGI FGAAHRLVYGAKGDSGQKYLAWSGHSAR<br>RDMARAGVPIPEIMRAGGWTTVNSVMNYIRNLDSETGAMVRLLEDSD*  |
| B08 | VRRVQSTHTKLS ALLTDATSDVTRKNLADMFRDSQAFSEHTWKMLLSVCRSWAAWCELNNRKWLPVEPEDVRDY<br>LLHLQTRGLAVKTIQHHLGSLNMLHRRAGLPRPGDSNAVSLVMRRIRRENV DAGERAQALAFERTDFDQVRS<br>VENS DRCQDIRNLAFLGVAYNTLLRISEIARIRVKDISRTDGGRM LIHIGRTKTVSTAGVEKTL<br>RWISVSGVSDDPNNYLFCRVRRYGVAKPSATSQSLSTYALQGI FGAAHCLVYGAKGDSGQKYLAWSGHSAR<br>RDMARAGVPIPEIMQAGGWTTVNSVMNYIRNLDSETGAMVRLLEDSD*        |
| B09 | QFQFPTPHQSL PALLTDATSDVTRKNLANMFRDSQAFSEHTWKMLLSVCRSWAVAWCELNNRKWLPVEPEDVRDY<br>LRHLQTRGLAVKTIQHHLGSLNMLHRRAGLPRPGDSNAVSLVMRRIRRENV DAGERAQALAFERTDFDQVRS<br>VENS DRCQDIRNLAFLGVAYNTLLRISEIARIRVKDISRTDGGRM LIHIGRTKTLVSTAGVEKALSLGVT<br>RWISVSGVADDPNNYLFCRVRRYGVAKPSATSQSLSTYALQGI FGAAHRLVYGAKGDSGQKYLAWSGHSAR<br>RDMARAGVPIPEIMRAGGWTTVNSVMNYIRNLDSEAGAMVRLLEDSD* |
| B10 | RGHVQFPHPNFFALLTDATSDVTCKNLADMFRDSQAFSEHTWKMLLSVCRSWAAWCELNNRKWLPVEPEDVRDY<br>LLHLQTRGLAVKTIQHHLGSLNMLHRRAGLPRPGDSNAVSLVMRRIRRENV DAGERAQALAFERTDFDQVRS<br>VETS DRCQDIRNLAFLGVAYNTLLRISEIARIRVKDISRTDGGRM LIHIGRTKTLVSTAGVEKALSLGVT<br>RWISVSGVADDPNNYLFCRVRRYGVAKPSATSQSLSTYALQGI FGAAHRLVYGAKGDSGQKYLAWSGHSAR<br>RDMARAGVPIPEIMQAGGWTTVNSVMNYIRNLDSETGAMVRLLEDSD*   |
| B11 | RSNLQTPHQSL SALLTDATSDVTRKNLADMFRDSQAFSEHTWKMLLSVCRSWAAWCELNNRKWLPVEPEDARDY<br>LLHLQTRGLAVKTIQHHLGSLNMLHRRAGLPRPSDSNAVSLVMRRIRRENV DAGERAQALAFERTDFDQVRS<br>VENS DRCQDIRNLAFLGVAYNTLLRISEIARIRVKDISRTDGGRM LIHIGRTKTLVSTAGVEKALSLGVT<br>RWISVSGVAGDPNNYLFCRVRRYGVAKPSATSRLSTYALQGI FGAAHRLVYGAKGDSGQKYLAWSGHSAR<br>RDMARAGVPIPEIMQAGGWTTVNSVMNYIRNLDSETGAMVRLLEDSS*   |
| B12 | MSNLQTPHQSL PALLTDATSDVTRKNLADMFRDSQAFSEHTWKMLLSVCRSWAAWCELNNRKWLPVEPEDVRDY<br>LLHLQTRGLAVKTIQHHLGSLNMLHRRAGLPRPGDSNAVSLVMRRIRRENV DAGERAQALAFERTDFDQVRS<br>VENS DRCQDIRNLAFLGVAYNTLLRISEIARIRVKDISRTDGGRM LIHVGRKTLVSTAGVEKALSLGVT<br>RWISVSGVADDPNNYLFCRVRRYGVAKPSATSQSLSTYALQGI FGAAHRLVYGAKGDSGQKYLAWSGHSAR<br>RDMARAGVPIPEIMQAGGWTTVNSVMNYIRNLDSETGAMVRLLEDSD*   |

**Supplementary Table S3**

|     |                                                                                                                                                                                                                                                                                                                                                                                    |
|-----|------------------------------------------------------------------------------------------------------------------------------------------------------------------------------------------------------------------------------------------------------------------------------------------------------------------------------------------------------------------------------------|
| C02 | MSNLQTPHQSL SALLTDATSDVIRKLN LADMFRDNQAFSEHTWKMLLSVCRSWAAWCELNNRKWLPVEPEDVRDY<br>LMHLQTRGLAVKTIQHHLGSLNMLHRRAGLPRPGDSNAVSLVMRRIRRENDAGERAQQALAFERTDFDQVRSL<br>VENS DRCQDIRNL AFLGVAYNTLLRI SEIARIRVKDISRTDGGRLIHI GRTKTLVSTAGVEKALSLGVTKLVE<br>RWISVSGVADDPNNYLFCRVRRYGVAKPSATSQ LSTYALQGI FGAHRLVYGAKGDSGQKYLAWSGHSARVGAA<br>RDMARAGVPIPEIMQAGGWTTVNSVMNYIRNLDSETGAMVR LLEDS*     |
| C03 | MSNIQTPHQSL SALLTDATSDVTRKLN LADMFRDSQAFSEHTWKMLLSVCRSWAAWCELNNRKWLPVEPEDVRVY<br>LLHLQTRGLAVKTIQHHLGSLNMLHRRAGLPRPGDSNAVSLVMRRIRRENVEAGERAQQALAFGR TDFDQVRSL<br>VENS DRCQDIRNL AFLGVAYNTLLRI SEIARIRVKDISRTDGGRLIHI GRTKTLVSTAGVEKALSLGVTKLVE<br>RWISVSGVADDPNNYLFCRVRRYGVAKPSATSQ LSTYALQGI FGAHRLVYGAKGDSGQKYLAWSGHSARVGAA<br>RDMARAGVPIQEIMRAGGWTTVNSVMNYIRNLDSETGAMVR LLEDS*   |
| C06 | MSNLQTPHQSL SALLTDATSDVTRKLN LADMFRDSQAFSEHTWKMLLSVCRSWAAWCELNNRKWLPVEPEDVRDY<br>LLHLQTRGLAVKTIQHHLGSLNMLHRRAGLPRPGDSNAVSLVMRRIRRENDAGERAQQALAFERTDFDQVRSL<br>VENS DRCQDIRNL AFLGVAYNTLLRI SEIARIRVKDISHTDGGRLIHI GRTKTLVSTAGVEKALSLGVTKLVE<br>RWISVSGVADDPNNYLFCRVRRYGI AKPSATSQ LSTYALQGI FGAHRLVYGAKGDSGQKYLAWSGHSARVGAA<br>RDMARAGVPIPEIMQAGGWTTVNSVMNYIRNLDSETGAMVR LLEDS*    |
| C07 | GSNLQTPHQSL SALLTDATSDVTRKLN LADMFRDSQAFSEHTWKMLLSVCRSWAAWCELNNRKWLP AEPEDVRDY<br>LLHLQTRGLAVKTIQHHLGSLNMLHRRAGLPRPGDSNAVSLVMRRIRRENDAGERAQQALAFERTDFDQVRSL<br>VENS DRCQDIRNL AFLGVAYNTLLRI SEIARIRVKDISRTDGGRLIHI GRTKTLI STAGVEKALSLGVTKLVE<br>RWISVSGVADDPNNYLFCRVRRYGVAKPSATSQ LSTYALQGI FGAHRLVYGAKGDSGQKYLAWSGHSARVGAA<br>RDMARAGVPLPEIMRAGGWTTVNSVMNYIRNLDSETGAMVR LLEDGD*  |
| C08 | MSNVQTPHQSL SALLTGATSDVTRKLN LAHMF RDSQAFSEHTWKMLLSVCRSWATWCELNNRKWLP AEPEDVRDY<br>LLHLQTRGLAVKTIQHHLGSLNMLHRRAGLPRPGDSNAVSLVMRRIRRENDAGERAQQALAFERTDFDQVRSL<br>VENS DRSQDIRNL AFLGVAYNTLLRI SEIARIRAKDISRTDSGRMLIHI GRTKTLVGTAGVEKVL SLGVTKLVE<br>RWISVSGVADDPNNYLFCRVRRYGVAKPSATSQ LSTYAMQGI FGAHRLVYGAKGDSGQKYLAWSGHSARVGAA<br>RDMARAGVPIPEIMQAGGWTTVNSVMNYIRNLDSETGAMVR LLEDS* |
| C09 | SSSNYPHPNLS ALLTDATSDVTRKLN LADMFRDSQAYSEHTWKMLLSVCRSWAAWCELNNRKRLPVEPEDVRDY<br>LLHLQTRGLAVKTIQHHLGSLNMLHRRAGLPRPGDSNAVSLVMRRIRRENVVAGERAQQALAFERTDFDQVRSL<br>VENS DRCQDIRNL AFLGVAYNTLLRI SEIARIRVKDISRTDGGRLIHI GRTKTLVSTAGVEKTL SLGVTKLVE<br>RWISVSGVADDPNNYLFCRVRRYGVAKPSATSQ LSTYALQGI FGAHRLVYGAKGDSGQKYLAWSGHSARVGAA<br>RDMARAGVPIPEIMQAGGWTTVNSVMNYIRNLDSETGAMVR LLEDSE*   |
| C10 | SSNLQTPPQSL SALLTDAMSDVTRKLN LANMF RDSQAFSEHTWKTL LSVCRSWAAWCELNDRKLLPVEPEDVRDY L<br>LHLQTRGLAVKTIQHHLGSLNMLHRRAGLPRPGDSNAVSLVMRRIRRENDAGERAQQALAFERTDFDQVRSLV<br>ENS DRCQDIRNL AFLGVAYNTLLRI SEIARIRVKDISRTDGGRLIHI GRTKTLVSAAGVEKALSLGVTKLVER<br>WISVSGVADDPNNYLFCRVRRYGVV KPSATSQ LSTYALQGI FGAHRLVYGAKGDSGQKYLAWSGHSARVGAAR<br>DMARAGVPIPEIMRAGGWTTVNSVMNYIRNLDSETGAMVR LLEDS* |
| C11 | MSNIQTPHQSL SALLTDAASDVTRKLN LADMFRDSQAFSEHTWKMLLSVCRSWAAWCELNNRKRLPVEPEDVRDY<br>LLHLQTRGLAVKTIQHHLGSLNMLHRRAGLPRPGDSNAVSLVMRRIRRENDAGERAQQALAFERTDFDQVRSL<br>VENS DRCQDIRNL AFLGVAYNTLLRI SEIARIRVKDISRTDGGRLIHI GRTKTLVSTAGAEKALSLGVTKLVE<br>RWISVSGVADDPNNYLFCRVRRYGVAKPSATSQ LSTYALQGI FGAHRLVYGAKNSGQKYLAWSGHSARVGAA<br>RDMARAGVPIPEIMQAGGWTTVNSVMNYIRNLDSETGAMVR LLEDS*      |
| C12 | SSNLQTPHQSL PALLTDATSDVIRKLN LADMFRDSQAFSEHTWKMLLSVCRSWAAWCEL SNRKWLP AEPEDVRDY<br>LLHLQTRGLAVKTIQHHLGSLNMLHRRAGLPRPGDSNVLLVMRRIRRENDAGERAQQALAFERTDFDQVRSL<br>VGN S DRCQDIRNL ALLGVAYNTLLRI SEIARIRVKDISRTDGGRLIHI GRTKTLVSTAGIEKALSLGVTKLVE<br>RWISVSGVAEDPNNYLFCRVRRYGVAKPSATNQLSTYALQGI FGAHRLVYGAKGDSGQKYLAWSGHSARVGAA<br>RDMARAGVPIPEIMQAGWLDPVNSVMNYFQNL DSETGAMCSLLQDTD*   |
| D01 | QVQLQTPHQSL SALLTDATSDVTRKLN LADIFRDSQAFSEHTWKMLLSVCRSWAAWCELNNRKWLPVEPEDVRDY<br>LLHLQTRGLAVKTIQHHLGSLNMLHRRAGLPRPGDSNAVSLVMRRIRRENDAGERAQQALAFRRTDFDKVRSL<br>VENS DRCQDIRNL AFLGVAYNTLLRI SEIARIRVKDISRTGGGRLIHI GRTKTLVSTAGVEKALSLGVTRLVE<br>RWISVSGVADDPNNYLFCRVRRYGVAKPSATSQ LSTYALQGI FGAHRLVYGTKCDSGQKYLAWSGHSARVGAA<br>RDMARAGVPIQGI MQAGGWTTVNSVMNYIRNLDSETGAMVR LLEDS*    |
| D02 | MSNLQPHQSL SALLTDAASDVTRKLN LADMFRDSQAFSEHTWKMLLSVCRSWAAWCELNNRKWLPVEPEDVRDY L<br>LHLQARGLAVKTIQHHLGSLNMLHRRAGLPRPGDSNAVSLVMRRIRRENDAGERAQQALAFGR TDFDQVRSLV<br>ENS DRCQDIRNL AFLGVAYNTLLRI SEIARIRVKDISRTDGGRLIHI GRTKTVSTAGVEKALSLGVTKL VGR<br>WISVSGVADDPNNYLFCRVRRYGVAKPSATSQ LSTYALQGI FGAHRLVYGDKGDSGQKYLAWSGHSARVGAAR<br>DMARAGVPIPEIMRAGGWTTVNSVMNYIRNLDSETGAMVR LLEDS*    |
| D03 | MTNLQTPPQL FALLSDATS DARKNLADMFRDSQAFSEHTWKMLLSVCRSWAAWCEMNNRKWLP AEPEDVRDY LL<br>HLQTRGLAVKTIQHHLGSLNMLHRRAGLPRPGDSNAVSLVMRRIRRESVDAGERAQQALAFERTDFDQVRSLVE<br>NS DRCQDIRNL AFLGVAYNTLLRI SEIARIRVKDISRTDGGRLIHI GRTKTLVSTAGVEKALSLGVTKLVERW                                                                                                                                      |

**Supplementary Table S3**

|     |                                                                                                                                                                                                                                                                                                                                                                                    |
|-----|------------------------------------------------------------------------------------------------------------------------------------------------------------------------------------------------------------------------------------------------------------------------------------------------------------------------------------------------------------------------------------|
|     | ISVSGVADDPNNYLFCRVRRYGVAKPSATSQSLSTYALQGI FGAHRLVY GAKGDSGQKY LAWSGHSARVGAARD<br>MARAGVPIPEIMQAGGWTTVNSVMNYIRNLDSETGAMVRLLEDS*                                                                                                                                                                                                                                                     |
| D04 | MSNLQTPHQLFALLTDATSDVTRKNLADMFRDSQAFSEHTWKTLSSVCRSWAAWCELNNRKLWPVEPEDVRDY<br>LHLQTRGLAVKTIQHHLGSLNMLHRRAGLPRPGDSNAVSLVMRRI RRENV DAGERAQALAFGRDQVRS<br>LVENSDRCQDIRNLAFLGVAYNTLLRISEIARIRVKDISRTDGGRLIHI GRTKTLVSTAGVEKALS LGVTKLVER<br>WISVSGVADDPNNYLFCRVRRYGVAKPSATSQSLSTYALQGI FGAHRLVY GAKGDSGQKY LAWSGHSARVGAARD<br>DMARAGVPIPEIMQAGGWTTVNSVMNYIRNLDSETGAMVRLLEDS*           |
| D05 | MSNIQTPHQSL SALLTDATSDVTCKNLADMFRDSQAFSEHTWKMLLSVCRSWAAWCELNNRKLWPVEPEDVRDY<br>LLHLQTRGLAVKTIQHHLGSLNMLHRRAGLPRPGDSNAVSLVMRRI RRENV DAGERAQALAFERTDFDQVRS<br>LVENSDRCQDIRNLAFLGVAYNTLLRISEIARIRVKDISRTDGGRLIHI GRTKTLASTAGVEKALS LGVTELVE<br>RWISVSGVADDPNNYLFCRVRRYGVAKPSATSQSLSTYALQGI FGAHRLVY GAKGDSGQKY QAWSGHSARVGAARD<br>DMARAGVPIPEIMQAGGWTTVNSVMNYIRNLDSETGAMVRLLEDS*     |
| D06 | SSSIHTPHQSL SALLTDATSDVTRKNLADMFRDSQAFSEHTWKMLLSVCRSWAAWCELNNRKLWPVEPEDVRDY<br>LLHLQTRGLAVKTIQHHLGSLNMLHRRAGLPRPGDSNAVSLVMRRI RRENV DAGERAQALAFERTDFDQVRS<br>L MENS DRCQDIRNLAFLGVAYNTLLRISEIARIRV RDISRTDGGRLIHI GRTKTLVSTAGVEKALS LGVTKLVE<br>RWISVSGVAEDPNNYLFCRVRRYGVAKPSATSQSLSTYALQGI FGAHRLVY GAKGDSGQKY LAWSGHSARVGAARD<br>DMARAGVPIPEIMQAGGWTTVNSVMNYIRNLDSETGAMVRLLEDS*  |
| D07 | MSSIQTPHQSL SALLTDATSGVTRKNLADMFRDSQAFSEHTWKMLLSVCRSWAAWCELNNRKLWPVEPEDVRDY<br>LLHLQTRGLAVKTIQHHLGSLNMLHRRAGLPRPGDSNAVSLVMRRI RRENV DAGGRAQQALAFERTDFDQVRS<br>L VENS DRCRDIRNLAFLGVAYNTLLRISEIARIRVKDISRTDGGRLIHI GRTKTLVSTAGLEKALS LGVTKLVE<br>RWISVSGVADDPNNYLFCRVRRYGVAKPSATSQSLSTYALQGI FGAHRLVY GAKGDSGQKY LAWSGHSARVGAARD<br>DMARAGVPIPEIMQAGGWTTVNSVMNYIRNLDSETGAMVRLLEDS*  |
| D09 | SSSIYRPHTKFVICILT DATSDVTRKNLADMFRDSQAFSEHTWKMLLSVCRSWAAWCELNNRKLWPVEPEDVRDY<br>LLHLQTRGLAVKTIQHHLGSLNMLHRRAGLPRPGDSNAVSLVMRRI RRENV DAGERAQALAFERTDFDQVRS<br>L VENS DRCQDIRNLAFLGVAYNTLLRISEIARIRV RDISRTDGGRLIHI GRTKTLASTAGVEKALS LGVTKLVE<br>RWISVSGVADDPNNYLFCRVRRYGVAKPSATSQSLSTYALQGI FGAHRLVY GAKGDSGQKY LAWSGHSARVGAARD<br>DMARAGVPIPEIMRAGGWTTVNSVMNYIRNLDSETGAMVRLLEDS* |
| D10 | ISHFQAPNPSL FALLTDATSDVTRKNLADMFRDSQAFSEHTWKMLLSVCRSWAAWCELNNRKLWPVEPEDVRDY<br>LLHLQTRGLAVKTIQHHLGSLNMLHRRAGLPRPGDSNAVSLVMRRI RRENV DAGERAQALAFERADFDQVRS<br>L VENS DRCQDIRNLAFLGVAYNTLLRISEIARIRVKDISRTDGGRLVHI GRTKTRVSTAGVEKALS LGVTKLVE<br>RWISVSGVADDPNNYLFCRVRRYGVAKPSATSQSLSTYALQGI FGAHRLVY GAKGDSGQKY LAWSGHSARVGAARD<br>DMARAGVPIPEIMRAGGWTTVNSVMNYIRNLDSETGAMVRLLEDS*   |
| D11 | MSNIQTPHQSL SALLTDATSDVTRKNLADMFRDSQAFSEHTWKMLLSVCRSWAAWCELNNRKLWPVEPEDVRDY<br>LLHLQARGLAVKTIQHHLGSLNMLHRRAGLPRPGDSIAVSLVMRRI RRENV DAGERAQALAFERTDFDRVRS<br>L VENS DRCQDIRNLAFLGVAYNTLLRISEIARIRVKDISRTDGGRLIHI GRTKTLVSTAGVEKALS LGVTKLVE<br>RWISVSGVADDPNNYLFCRVRRYGVAKPSATSQSLSTYALQGI FGAHRLVY GAKGDSGQKY LAWSGHSARVGAARD<br>DMARAGVPIPEIMQAGGWTTVNSVMNYIRNLDSEAGAMVRLLEDS*   |
| E01 | RGNL TAPHQSL SALLTDATRDVTRKNLADMFRDSQAFSEHTWKMLLSVCRSWAAWCELNNRKLWPVEPEDVRDY<br>LLHLQTRGLAVKTIQHHLGSLNMLHRRAGLPRPGDSNAVSLVMRRI RRENV DAGERAQALAFERTDFDQVRS<br>L VENS DRCQDIRNLAFLGVAYNTLLRISEIARIRVKDISRTDGGRLIHI GRTKTQVSTAGVERALS LGVTKLVE<br>RWISVSGVADDPNNYLFCRVRRYGVAKPSATSQSLSTYALQGI FGAHRM VY GAKGDSGQKY LAWSGHSARVGAARD<br>DMARAGVPIPEIMQAGGWATVNSVMNYIRNLDSETGAMVRLLEDS* |
| E02 | HFQFPTRQSL SALLTDATSDVICKNLADMFRDSQAFSEHTWKTLSSVCRSWAAWCKLNNRKLWPVEPEDVRDY<br>LLHLQTRGLAVKTIQHHLGSLNMLHRRAGLPRPGDSNAVSLVMRRI RRENV DAGERAQALAFERTDFDQVRS<br>L VENS DRCQDIRNLAFLGVAYNTLLRISEIARIRVKDISRTDGGRLIHI GRTKTLVSTAGVEKALS LGVTKLVE<br>RWISVSGVADDPNNYLFCRVRRYGVAKPSATSQSLSTYALQGI FGAHRLVY GAKGDSGQKY LAWSGHSARVGAARD<br>DMARAGVPIPEIMRAGGWTTVNSVMNYIRNLDSETGAMVRLLEDS*    |
| E03 | SSPITDPTPKL FALLTDATSDLTRKNLADMFRDSQAFSEHTWKMLLSVCRSWTAWCELNNRKLWPVEPEDVRDY<br>LLHLQTRGLAVKTIQHHLGSLNMLHRRAGLPRPGDSNAVSLVMRRI RRENV DAGERAQALAFERTDFDQVRS<br>L VENS DRCQDIRNLAFLGVAYNTLLRISEIARIRVKDISRTDGGRLIHI GRTKTLVSTAGVEKALS LGVTKLVE<br>RWISVSGVADDPNNYLFCRVRRYGVAKPSATSQSLSTYALQGI FGAHRLVY GAKGDSGQKY LAWSGHSARVGAARD<br>DMARAGVPIPEIMQAGGWTTVNSVMNYIRNLDSETGAMVRLLEDS*   |
| E05 | ISNLQTPHQSL SALLTDATSDVTRKNLADMFRDSQAFSEHTWKMLLSVCRSWAVWCELNNRKLWPVEPEDVRDY<br>LLHLQTRGLAVKTIQHHLGSLNMLHRRAGLPRPGDSNVLLVMRRI RRENV DAGERAQALAFERTDFDQVRS<br>L VENS DRCQDIRNLAFLGVAYNTLLRISEIARIRVKDISRTDGGRLIHI VGRTKTLVRTAGVEKALS LGVTKLVE<br>RWITVSGVADDPNNYLFCRVRRYGVAKPSATSQSLSTYALQGI FGAHRLVY GAKGDSGQKY LAWSGHSARVGAARD<br>DMARAGVPIPEIMQAGGWTTVNSVMNYIRNLDSETGAMVRLLEDS*   |

**Supplementary Table S3**

|     |                                                                                                                                                                                                                                                                                                                                                                           |
|-----|---------------------------------------------------------------------------------------------------------------------------------------------------------------------------------------------------------------------------------------------------------------------------------------------------------------------------------------------------------------------------|
| E06 | RVQLQTPHQSL SALLTDATSDVTRKNLADMFRDSQAFSVHTWKMLLSVCRSWAAWCELNNRKWLPVEPEDVRDY<br>LLHLQTRGLAVKTIQHHLGSLNMLHRRAGLPRPGDSNAVSLVMRRIRRENVEAGERAQQALAFERTDFDQVRSL<br>VENSRCQDIRNLAFLGVAYNTLLRI SEIARIRVKDISRTDGGRLIHI GRTKTLVSTAGVEKALSLGVTKLVE<br>RWISVSGVADDPNNYLCRVRRYGVAKPSATSQSLSTYALQGI FGAHRLVYGAKGDSGQKYLAWSGHSARVGAA<br>RDMARAGVPIPEIMRAGGWTTVNSVMNYIRNLDGETGAMVRLLESD*  |
| E07 | PVQLQTPHQSL SALLTDATSDVTRKNLADMFRDSQAFSEHTWKMLLSVCRSWAAWCELNNRKWLPVEPEDVRDY<br>LLHLQTRGLAVKTIQHHLGSLNMLHRRAGLPRPGDSNAVSLVMRRIRRENDAGERAQQALAFERTDFDQVRSL<br>AENSRCQDIRNLAFLGVAYNTLLRI SEIARIRVKDISRTDGGRLIHI GRTKTLVSTAGVEKALSLGVTKLVE<br>RWISVSGVADDPNNYLCRVRRYGVAKPSATRQLSTYALQGI FGAHRLVYGAKGDSGQKYLAWSGHSARVGAA<br>RDMARAGVPIPEIMQAGGWTTVNSVMNYIRNLDGETGAMVRLLESD*    |
| E08 | YVHIQTPHQSL SALLTDATSDVTRKNLADMFRDSQAFSEHTWKMLLSVCRSWAAWCELNNRKWLPVEPEDVRDY<br>LLHLQTRGLAVKTIQHHLGSLNMLHRRAGLPRPGDSNAVSLVMRRIRRENDAGERAQQALAFERTDFDQVRSL<br>VENSRCQDIRNLAFLGVAYNTLLRI SEIARVRVKDISRTDGGRLIHI GRTKTLVSTAGVEKALSLGVTKLVE<br>RWISVSGVADDPNNYLCRVRRYGVAKPSATSQSLSTYALQGI FGAHRLVYGAKGDSGQKYLAWSGHSARVGAA<br>RDMARAGVPIPEIMQAGGWTTVNSVMNYIRNLDSETGAMVRLLESD*   |
| E09 | VISITTPHQSL SALLTDATSDVTRKNLADMFRDSQAFSEHTWKMLLSVCRSWAAWCELNNRKWLPVEPEDVRDY<br>LMHLQTRGLAVKTIQHHLGSLNMLHRRAGLPRPGDSNAVSLVMRRIRRENADAGERAQQALAFERTDFDQVRSL<br>VENSRCQDIRNLAFLGVAYNTLLRI SEIARIRVKDISRTDGGRLIHI GRTKTLVSTAGVEKALSLGVTKLVE<br>RWISVSGVADDLNNYLCRVRRYGVAKPSATSQSLSTYALQGI FGAHRLVYGVKGDGSGQKYLAWSGHSARVGAA<br>RDMARAGVPIPEIMRAGGWTTVNSVMNYIRNLDSETGAMVRLLESD* |
| E11 | MSNIQTPHQSL SALLTDATSDVTRKNLADMFRDSQAFSEHTWKMLLSVCRSWAAWCELNNRKWLPVEPEDVRDY<br>LLHLQTRGLAVKTIQHHLGSLNMLHRRAGLPRPGDSNAVSLVMRRIRRENDAGERAQQALAFERTDFDQVRSL<br>VENSRCQDIRNLAFLGVAYNTLLRI SEIARIRVKDISRTDGGRLIHI GRTKTLVSTAGVEKALSLGVTKLVE<br>RWISVSGVADDPNNYLCRVRRYGVAKPSATSQSLSTYALQGI FGAHRLVYGAKGDSGQKYPAWSGHSARVGAA<br>RDMARAGVPIPEIMQAGGWTTVNSVMNYIRNLDSETGAMVRLLESD*   |
| E12 | YVHLQTPHQSL SALLTGATSDVTRKNLADMFRDSQAFSEHTWKMLLSVCRSWAAWCELNNRKWLPVEPEDVRDY<br>LLHLQTRGLAVKTIQHHLGSLNMLHRRAGLPRPGDSNAVSLVMRRIRRENDAGERAQQALAFERTDFDQVRSL<br>AENSRCQDIRNLAFLGVAYNTLLRI SEIARIRVKDISRTDGGRLIHI GRTKTLVSTAGVVKALSLGVTKLVE<br>RWISVSGVADDSNNYLCRVRRYGVAKPSATSQSLSTYALQGI FGAHRLVYGAKGDSGQKYLAWSGHSARVGAA<br>RDMARAGVPIPEIMRAGGWTTVNSVMNYIRNLDSETGAMVRLLESD*   |
| F01 | WTDIQTPHQSL SALLTDATSDVTRKNLADMFRDSQAFSEHTWKMLLSVCRSWAAWCELNNRKRLPVEPEDVRDY<br>LLHLQTRGLAVKTIQHHLGSLNMLHRRAGLPRPGDSNAVSLVMRRIRRENDAGERAQQALAFERTDFDQVRSL<br>VENSRCQDIRNLAFLGVAYNTLLRI SEIARIRVKDISRTDGGRLIHI GRTKTLVSTAGVEKALSLGVTKLVE<br>RWISVSGVADDPNNYLCRVRRYGVAKPSATSQSLSTYALQGI FGAHRLVYGAKGDSGQKYLAWSGHSARVGAA<br>RDMARAGVPIPEIMHAGGWSTVNSVMNYIRNLDSETGAMVRLLESD*   |
| F02 | WSNIQTPHQSL SALLTDATSDVTRKNLADMFRDSQAFSEHTWKMLLSVCRSWAAWCELNNRKWLPVEPEDVRDY<br>LLHLQTRGLAVKTIQHHLGSLNMLHRRAGLPRPGDSNAVSLVMRRIRRENDAGERAQQALAFERADFDQVRSL<br>VENSRCQDIRNLAFLGVAYNTLLRI SEIARIRVKDISRTDGGRLIHI GRTKTLVSTAGVEKALSLGVTKLVE<br>RWISVSGVADDPNNYLCRVRRYGVAKPSASSQSLSTYALQGI FGAHRLVYGAKGDSGQKYLAWSGHSARVGAA<br>RDMARAGVPIPEIMQAGGWTTVNSVMNYIRNLDSETGAMVRLLESD*   |
| F03 | RVHVQLPHPNLSALLTVATSDVTRKNLADMFRDSQAFSEHTWKMLLSVCRSWAAWCELNNRKWLPVEPEDVRDY<br>LLHLQTRGLAVKTIQHHLGSLNMLHRRAGLPRPGDSNVVSLVMRRIRRENDAGERAQQALAFERTDFDQVRSL<br>VENSRCQDIRNLAFLGVAYNTLLRI SEIARIRVKDISRTDGGRLIHI GRTKTLVSTAGVEKALSLGVTKLVE<br>RWISVSGVADDPNNYLCRVRRYGVAKPSATSQSLSTYALQGI FGAHRLVYGAKGDSGQKYLAWSGHSARVGAA<br>RDMARAGVPIPEIMRAGGWTTVNSVMNYIRNLDSETGAMVRLLESD*    |
| F04 | HVQLQTPRQSL SALLTDATSDVTRKNLADMFRDSQAFSEHTWKMLLSVCRSWAAWCELNNRKWLPVEPEDVRDY<br>LLHLQTRGLAVKTIQHHLGSLNMLHRRAGLPRPGDSNAVSLVMRRIRRESVDAGERAQQALAFERTDFDQVRSL<br>MENSRCQDIRNLAFLGVAYNTLLRI SEIARIRVKDISRTDGGRLIHI GRTKTLVSTAGVEKALSLGVTKLIE<br>RWISVSGVADDPNNYLCRVRRYGVAKPSATSQSLSTYALQGI FGAHRLVHGAKGDSGQKYLAWSGHSARVGAA<br>RDMARAGVPIPEIMQAGGWTTVNSVMNYIRNLDSETGAMVRLLESD*  |
| F05 | MSNLQTPRQSL SALLTDATSDVTRKNLADMFRDSQAFSEHTWKMLLSVCRSWAAWCELNNRKWLPVEPEDVRDY<br>LLHLQTRGLAVKTIQHHLGSLNMLHRRAGLPRPGDSNAVSLVMRRIRRENDAGERAQQALAFGRDQVRSL<br>VENSRCQDIRNLAFLGVAYNTLLRI SEIARIRVKDISRTDGGRLIHI GRTKTLVSTAGVVKALSLGVTKLVE<br>RWISVSGVADDPNNYLCRVRRYGVAKPSATSQSLSTYALQGI FGAHRLVYGAKGDSGQKYLAWSGHSARVGAA<br>RDMARAGVPIPEIMQAGGWTTVNSVMNYIRNLDSETGAMVRLLESD*      |
| F06 | ASSLQTLHQSL SALLTDATSDVTRKNLADMFRDSQAFSEHTWRMMLLSVCRSWAAWCELNNRKWLPVEPEDVRDY<br>LLHLQTRGLAVKTIQHHLGSLNMLHRRAGLPRPGDSNTVSLVMRRIRRENDAGERAQQALAFERTDFDQVRSL<br>VENSRCQDIRNLAFLGVAYNTLLRVSEIARIRVKDISRTDGGRLIHI GRTKTLVSAAGVEKALSLGVTKLVE                                                                                                                                    |

**Supplementary Table S3**

|     |                                                                                                                                                                                                                                                                                                                                                                           |
|-----|---------------------------------------------------------------------------------------------------------------------------------------------------------------------------------------------------------------------------------------------------------------------------------------------------------------------------------------------------------------------------|
|     | RWISVSGVADDPNNYLFCRVRRYGVAKPSATSQSLSTYALQGIFGAAHRLVYGAKGDSGQKYLAWSGHSARVGAA<br>RDMARAGVPIPEIMQAGGWTTVNSVMNYIRNLDSETGAMVRLLEDS*                                                                                                                                                                                                                                            |
| F07 | VQSIYSPTPNLSALLTDATSDVARKNLAVMFRDSQAFSEHTWRMLLSVCRSWAAWCELNRRKWLPEPEDVRDY<br>LLHLQTRGLAVKTIQHHLGSLNMLHRRAGLPRPGDSNAVSLVMRRIIRRENDAGERAQQALAFERTDFDKVRS<br>MGNSDRCDIRNLAFLGVAYNTLSRISEIARIRVKDISRTDGGRMILIHIGRTKTLVSTAGVEKALSLGVTKLVE<br>RWISVSGVADDPNNYLFCRVRRYGVAKPSATSQSLSTYALQGIFGAAHRLVYGAKGDSGQKYLAWSGHSARVGAA<br>RDMARAGVPIPEIMQAGGWTTVNSVMNYIRNLDSETGAMVRLLEDS*    |
| F08 | MSNYRPHPKVVCLLTDATSDVTRKNLAVMFRDSQAFSEHTWKMLLSVCRSWAAWCELNRRKWLPEPEDVRDY<br>LHLQTRGLAVKTIQHHLGSLNMLHRRAGLPRPGDSNAVSLVMRRIIRRENDAGERAQQALAFERTDFDQVRS<br>ENS DRCDIRNLAFLGVAYNTLLRISEIARIRVKDISRTDGGRMILIHIGRTKTLVSTAGVEKALSLGVTELVER<br>WISVSGVADDPNNYLFCRVRRYGVAKPSATSQSLSTYALQGIFGAAHRLVYGAKGDSGRKYLAWSGHSARVGAAR<br>DMARAGVPIPEIMRAGGWTTVNSVMNYIRNLDSETGAMVRLLEDS*      |
| F09 | QSNIRTPHQLSALLTDATSDVTRKNLADMFRDSQAFSEHTWKMLLSVCRSWAAWCELNRRKWLPEPEDVRDY<br>LHLQTRGLAVKTIQHHLGSLNMLHRRAGLPRPGDSNAVSLAMRRIIRRENDAGERAQQALAFERTDFDQVRS<br>ENS DRCDIRNLAFLGVAYNTLLRISEIARIRVKDISRTDGGRMILIHIGRTKTLVSTAGVEKALSLGVTKLVER<br>WISVSGVADDPNNYLFCRVRRYGVAKPSATSQSLSTYALQGIFGAAHRLVYGAKGDSGQKYLAWSGHSARVGAAR<br>DMARAGVPIPEIMQAGGWTTVNSVMNYIRNLDSETGAMVRLLEDS*      |
| F10 | QSNIRTPHQLSALLTDATSDVTRKNLADMFRDSQAFSEHTWKMLLSVCRSWAAWCELNRRKWLPEPEDVRDY<br>LLHLQTRGLAVKTIQHHLGSLNMLHRRAGLPRPGDSNAVSLVMRRIIRRENDAGERTQQALAFERTDFNQVRS<br>VENS DRCDIRNLAFLGVAYNTLLRISEIARIRVKDISRTDGGRMILIHIGRTKTLVSTAGVEKALSLGVTKLVE<br>RWISVSGVADDPNNYLFCRVRRYGVAKPSATSQSLSTYALQGIFGAAHRLVYGAKGDSGQKYLAWSGHSARVGAA<br>RDMARAGVPIPEIMRAGGWTTVNSVMNYIRNLDSETGAMVRLLEDS*    |
| G02 | HVQLPTPTPSLSALLTDATSDVTRKNLADMFRDSQAFSEHTWKMLLSVCRSWAAWCELNRRKWLPEPEDVRDY<br>LLHLQTRGLAVKTIQHHLGSLNMLHRRAGLPRPGDSNAVSLVMRRIIRRENDAGERAQQALAFERTDFDQVRS<br>VENS DRCDIRNLAFLGVAYNTLLRISEIARIRVKDISRTDGGRMILIHIGRTKTLVSTAGVEKALSLGVTKLVE<br>RWISVSGVADDPNNYLFCRVRRYGVAKPSATSQSLSTYALQGIFGAAHRLVYGAKGDSGQKYLAWSGHSARVGAA<br>RDMARAGVPIPEIMRAGGWTTVNSVMNYIRNLGSETGAMVRLLEDS*   |
| G05 | MSNLQTPHQLSALLTDATSDVTRKNLADMFRDSQAFSEHTWKMLLSVCRSWAAWCELNRRKRLPAEPEDVRDY<br>LRHLQARGLAVKTIQHHLGSLNMLHRRAGLPRPGDSNAVSLVMRRIIRRENDAGERAQQALAFERTDFDQVRS<br>VENS DRCDIRNLAFLGVAYNTLLRISEIARIRVKDISRTDGGRMILIHIGRTKTLVSTAGVEKALSLGVTKLVE<br>RWISVSGVADDPNNYLFCRVRRYGVAAAPSATSQSLSTDVLRGVFAAAHRLVYGTKDDSGQKYLAWSGHSARVGAA<br>RDMARAGVPIPEIMQAGGWTTVNSVMNYIRNLDSETGAMVRLLEDS*  |
| G06 | MSNLQTPPNLSALLTDATSDARKNLADMFRDSQAFSEHTWKMLLSVCRSWAAWCELNRRKWLPEPEDVRDY<br>LLHLQTRGLAVKTIQHHLGSLNMLHRRAGLPRPGDSNAVSLVMRRIIRRENDAGERAQQALAFERTDFDQVRS<br>VENS DRCDIRNLAFLGVAYNTLLRISEIARIRVKDISRTDGGRMILIHIGRTKTLVSTAGVEKALSLGVTRLVER<br>WISVSGVADDPNNYLFCRVRRYGVAKPSATSQSLSTYALQGIFGAAHRLVYGAKGDSGQKYLAWSGHSARVGAARD<br>MARAGVPIPEIMQAGGWTTVNSVMNYIRNMDSETGAMVRLLEDS*     |
| G07 | HVQLQTPHQLSALLTDATSDVTRKNLADMFRDSPAFSEHTWKMLLSVCRSWAAWCEQNNRRLKWLPEPEDVRDY<br>LLHLQMRGLAVKTIQHHLGSLNMLHRRAGLPRPGDSNAVSLVMRRIIRRENDAGERAQQALAFERTDFDQVRS<br>VENS DRCDIRNLAFLGVAYNTLLRISEIARIRVKDISRTDGGRMILIHIGRTKTLVSTAGVGKTLVSLGVTKLVE<br>RWISVSGVADDPNNYLFCRVRRYGVAKPSATSQSLSTYALQGIFGAAHRLVYGAKGDSGQKYLAWSGHSARVGAA<br>RDMARAGVPIPEIMRAGGWTTVNSVMNYIRNLDSETGAMVRLLEDS* |
| G08 | MSNLQTPHQLSALLTDATRDRVTRKNLADMFRDSQAFSEHTWRMLLSVCRSWTAWCELNRRKRLPEPEDVRDY<br>LLHLQTRGLAVKTIQHHLGSLNMLHRRAGLPRPGDSNAVSLVMRRIIRRENDAGERAQQALAFERTDFDQVRS<br>VENS DRCDIRNLAFLGVAYNTLLRISEIARIRVRDISRTDGGRMILIHIGRTKTLISTAGVEKALSLGVTKLVE<br>RWISVSGVADDPNNYLFCRVRRYGVAKPSATSQSLSTYALQGIFGAAHRLVYGAKGDSGQKYLAWSGHSARVGAT<br>RDMARAGVPIPEIMQAGGWTTVNSVMNYIRNLDSETGAMVRLLEDS*   |
| G09 | MSNLQTPPESFALLTDATSDVTRKNLADVFRDSQAFSEHTWKMLLSVCRSWAAWCELNRRKWLPEPEDVRDY<br>LHLQTRGLAVKTIQHHLGSLNMLHRRAGLPRPGDSNAVSLVMRRIIRRENDAGERAQQALAFERTDFDKVRS<br>ENS DRCDIRNLAFLGVAYNTLLRISEIARIRVKDISRTDGGRMILIHIGRTKTLVSTAGVEKALSLGVTRLVER<br>WISVSGVADDPNNYLFCRVRRYGIKPSATSQSLSTYALQGIFGAAHRLVYGAKGDSGQKYLAWSGHSARVGAAR<br>DMARAGVPIPEIMQAGGWTTVNSVNNYIRNLDSETGAMVRLLEDS*       |
| G10 | RSNLRTPHQLSALLTDATSDVTRRNLADMFRDSQAFSEHTWKMLLSVCRSWAAWCELNRRKWLPEPEDVRDY<br>LLHLQTRGLAVKTIQHHLGSLNMLHRRAGLPRPGDSNAVSLVMRRIIRRENDAGERAQQALAFERTDFDQVRS<br>VENS DRCDIRNLAFLGVAYNTLLRISEIARIRVKDISRTDGGRMILIHIGRTKTLVSTAGVEKALSLGVTKLVE<br>RWISVSGVADDPNNYLFCRVRRYGVAKPSATGQLSTYALQGIFGAAHRLIYGAKGDSGQKYLAWSGHSARVGAA<br>RDMARAGVPIPEIMRAGGWTTVNSVMNYIRNLDSETGAMVRLLEDS*     |



**Supplementary Table S3**

|     |                                                                                                                                                                                                                                                                                                                                                                           |
|-----|---------------------------------------------------------------------------------------------------------------------------------------------------------------------------------------------------------------------------------------------------------------------------------------------------------------------------------------------------------------------------|
| G11 | MSNIQTPHQSLFALLTDATSDVTRKNLADMFRDSQAFSEHTWKMLLSVCRSWAAWCELNNRKWLPVEPEDVRDY<br>LLHLQTRGLAVKTIQHHLGSLNMLHRRAGLPRPGDSNAVSLVMRRIRRENV DAGERAQQALAFERTDFDRVRS<br>VENS DRCQDIRNLAFLGVAYNTLLRI SEIARIRVKDISRTDGGRLIHI GRTKTLVSAAGVEKALSLGVSKLVE<br>RWISVSGVADDPNNYLCRVRRYGVAKPSATSQSLSTYALQGI FGAHRLVYGAKGDSGQKYLAWSGHSARVGAA<br>RDMARAGVPIPEIMQAGGWTTVNSVMNYIRNLDSETGAMVRLLESD* |
| G12 | MSNLRTPHQRLSALLADATSDVTRMNLADIFRDSQAFSEHTWKMLLSVCRSWAAWCELNNRRWLPVEPEDVRDY<br>LLHLQTRGLAVKTIQHHLGSLNMLHRRAGLPRPGDSNAVSLVMRRIRRENV DAGERAQQALAFERTDFDKVRS<br>MGNS DRCQDIRNLAFLGVAYNTLLRI SEIARIRVKDISRTDGGRLIHI GRTKTLVSTAGVEKALSLGVTKLVE<br>RWISVSGVADDPNNYLCRVRRYGVAKPSATSQSLSTYALQGI FGAHRLVYGAKGDSGQKYLAWSGHSARVGAA<br>RDMARAGVPIPEIMQAGGWTTENSVMNYIRNLGSETGAMVRLLESD* |
| H02 | MPNLRPPHQSLSALLTDATSDVTRKNLADVFRDSQAFSEHTWKTLSSVCRSWAAWCELNNRKWLPVEPEDVRDY<br>LLHLQTRGLAVKTIQHHLGSLNMLHRRAGLPRPGDSNAVSLVMRRIRRENV DAGERAQQALAFERTDFDQVRS<br>MGNS DRCQDVRNLAFLGVAYNTLLRI SEIARIRVKDISRTDGGRLIHI GRTKTLASTAGVEKALSLGVTKLVE<br>RWISVSGVADDPNNYLCRVRRYGVAKPSATSQSLSTYALQGI FGAHRLVYGAKGDSGQKYLAWSGHSARVGAA<br>RDMARAGVPIPEIMQAGGWATVNSVMNYIRNLDSETGAMVRLLESD* |
| H03 | YSSITDPPPNFFALLTDATSDVTRKNLADMLRDSQAFSEHTWKMLLSVCRSWAAWCELNNRKWLPVEPEDVRDY<br>LLHLQTRGLAVKTIQHHLGSLNMLHRRAGLPRPGDSNAVSLVMRRIRRENV DAGERAQQALAFERTDFDQVRS<br>VETS DRCQDIRNLAFLGVAYNTLLRI SEIARIRVKDISRTDGGRLIHI GRTKTLVSTAGVEKALSLGVTKLVE<br>RWISVSGVADDPNNYLCRVRRYGVAKPSATSQSLSTYALQGI FGAHRLVYGAKGNSGQKYLAWSGHSARVGAA<br>RDMARAGVPIPEIMRAGGWTTVNSVMNYIRNLDSETGAMVRLLESD* |
| H04 | RSRITDPPPNLFALLGDATSDACQNLADMFRDSQAFSEHTWKMLLSVCRSWAAWCELNNRKWLPVEPEDVRDY<br>LHLQTRGLAVKTIQHHLGSLNMLHRRAGLPRPGDSNAVSLVMRRIRRENV DAGERAQQALAFGRDQVRS<br>ENSNRCQDIRNLAFLGVAYNTLLRI SEIARIRVKDISRTDGGRLIHI GRTKTLVSTAGVEKALSLGVTKLVER<br>WMSVSGVADDPNNYLCRVRRYGVAKPSATSQSLSTYALQGI FGAHRLVYGAKGVSGQKYLAWSGHSARVGAAR<br>DMARAGVPIPEIMQAGGWTTVNSVMNYIRNLDSEAGAMVRLLESD*        |
| H05 | MSNLQTPHQSSSALLTDATSDVTRKNLADMFRDSQAFSEHTWKMLLSVCRSWAAWCELNNRKWLPVEPEDVRDY<br>LLHLQTRGLAVKTIQHHLGSLNMLHRRAGLPRPGDSNAVSLVMRRIRRENV DAGERAQQALAFERTDFDQVRS<br>VENS DRCQDIRNLAFLGVAYNTLLRI SEIARIRVKDISRTDGGRLIHI GRTKTLVSTAGVEKALSLGVTKLVE<br>RWISVSGVADDPNNYLCRVRRYGVAKPSATSKLSTYALQGI FGAHRLVYGAKGDSGQKYLAWSGHSARVGAA<br>RDMARAGVPIPEIMRAGGWTTVNSVMNYIRNLDSETGAMVRLLESD*  |
| H07 | MSNIQTPHQSLSALLTDATSDVTRKNLADMFRDSQAFSEHTWKMLLSVCRSWAAWCELNNRKWLPVEPEDVRDY<br>LLHLQARGLAVKTIQHHLGSLNMLHRRAGLPRPGDSNAVSLVMRRIRRENV DAGERAQQALAFERTDFDQVRS<br>VENS DRCQDIRNLAFLGVAYNTLLRI SEIARIRVKDISRTDGGRLIHI GRTKTLVSTAGVEKALSLGVTKLVE<br>RWISVSGVADDPNNYLCRVRRYGVAKPSATSQSLSTYALQGI FGAHRLVYGAKGDSGQKYLAWSGHSARVGAA<br>RDMARAGVPIPEIMQAGGWTTVNSVMNYIRNLDSETGAMVRLLESD* |
| H08 | MSNIRPHQVIVALLTDATSDVTRKNLADMFRDSQAFSEHTWKMLLSVCRSWAAWCELNNRKWLPVEPEDVRDY<br>LHLQTRGLAVKTIQHHLGSLNMLHRRAGLPRPGDSNAVSLVMRRIRRENV DAGERAQQALAFERTDFDQVRS<br>ENS DRCQDIRNLAFLGVAYNTLLRI SEIARIRVKDISRTDGGRLIHI GRTKTLVSTAGAEKALSLGVTKLVER<br>WISVSGVADDPNNYLCRVRRYGVAKPSATSQSLSTYALQGI FGAHRLVYGAKGDSGQKYLAWSGHSARVGAAR<br>DMARAGVPIPEIMRAGGWTTVNSVMNYIRNLDSETGAMVRLLEDGD*   |
| H09 | ISNLQTPTKVVCILTDATSDATRKNLADMFRDSQAFSEHTWKMLLSVFRSWPAWCELNNRKWLPVEPEDVRDY<br>LHLQTRGLAVKTIQHHLGSLNMLHRRAGLPRPGDSNAVSLVMRRIRRENV DAGERAQQALAFERTDFDQVRS<br>ENS DRCQDIRNLAFLGVAYNTLLRI SEIARIRVKDISRTDGGRLIHI GRTKTLVSTAGIEKALSLGVTKLVER<br>WISVSGVADDPNNYLCRVRRYGVAKPSATSQSLSTFALQGI FGAHRLVYGAKGDSGQKYLAWSGHSARVGAAR<br>DMARAGVPIPEIMRAGGWTTVNSVMNYIRNMDSETGAMVRLLESD*    |
| H10 | SSNLRPPPQILSIIIDEATMMDSQNLADMFRDSQAFSGHTWKMLLSVCRSWAAWCELNNRKWLPVEPEDVRDY<br>LHLQTRGLAVKTIQHHLGSLNMLHRRAGLPRPGDSNAVSLVMRRIRRENV DAGERAQQALAFERTDFDQVRS<br>NS DRCQDIRNLAFLGVAYNTLLRI SEIARIRVKDISRTDGGRLVHI GRTKTLVSTAGVEKALSLGVTKLVER<br>ISVSGVADDPNNYLCRVRRYGVAKPSATSQSLSTYALQGI FGAHRLVYGAKGDSGQKYLAWSGHSARVGAAR<br>MARAGVPIPEIMRAGGWTTVNSVMNYIRNLDSETGAMVRLLEGSD*      |
| H11 | HVHIQTPHQSLSALLTDATSDVTRKNLADMFRDSQAFSEHTWKMLLSVCRSWAAWCELNNRKWLPVEPEDVRDY<br>LLHLQTRGLAVKTIQHHLGSLNMLHRRAGLPRPGDSNAVSLVMRRIRRENV DAGERAQQALAFERTDFDQVRS<br>VENS DRCQDIRNLAFLGVAYNTLLRI SEIARIRVKDISRTDGGRLIHI GRTKTLVSTAGVEKALSLGVTKLVE<br>RWISVSGVADDPNNYLCRVRRYGVAKPSATSQSLSTYALQGI FGAHRLVYGAKGDSGQKYLAWSGHSARVGAA<br>RDMARAGVPIPEIMQAGGWTTVNSVMNYIRNLDSETGAMVRLLESD* |
